# Supplementary material for: Uncovering the pharmacological mechanisms of Zizhu ointment against diabetic ulcer by integrating network analysis and experimental evaluation in vivo and in vitro
Source: Front Pharmacol. 2022 Dec 13;13:1027677. doi: 10.3389/fphar.2022.1027677 (PMC9793990; doi:10.3389/fphar.2022.1027677)
Supplement: Supplementary file 1 [file Table2.XLSX]

## Sheet: ZZO compounds
Peak No	No.	m/z	RT min	ppm	compound name	adduct	score	PubCHEM CID	Superclass	Class	Subclass	Sample					RSD	Mean
												zzrg_POS_1	zzrg_POS_2	zzrg_POS_3	zzrg_POS_4	zzrg_POS_5
1	M155T84_4	155.082	1.4	0.4	Pyrrolopiperazine-2,5-dione	[M+H]+	0.997	Cid_193540	Organic_acids_and_derivatives	Carboxylic_acids_and_derivatives	Amino_acids__peptides__and_analogues	1.7655e+09	1.71502e+09	1.74676e+09	1.92491e+09	1.7524e+09	0.0463829	1.78092e+09
2	M188T295_2	188.143	4.92	0.6	N-[1-(2-Phenylethyl)-4-piperidinyl]-2-naphthamide	[M+H-C11H9NO]+	0.9995	Cid_35296170	Benzenoids	Naphthalenes	Naphthalenecarboxylic_acids_and_derivatives	1.17654e+09	1.21028e+09	1.18064e+09	1.16358e+09	1.15631e+09	0.0176524	1.17747e+09
3	M253T434_3	253.086	7.23	0.2	4'-Methoxyflavone	[M+H]+	0.9975	Cid_77793	Phenylpropanoids_and_polyketides	Flavonoids	O_methylated_flavonoids	4.02745e+09	4.04737e+09	4.3989e+09	4.03293e+09	4.28224e+09	0.0413783	4.15778e+09
4	M267T495_2	267.102	8.22	0.2	3,4'-Dimethoxy-2-hydroxychalcone	[M+H-H2O]+	0.9938	Cid_5976425	Phenylpropanoids_and_polyketides	Linear_1_3_diarylpropanoids	Chalcones_and_dihydrochalcones	2.67281e+10	2.77509e+10	2.96215e+10	2.94679e+10	2.71877e+10	0.0470232	2.81512e+10
5	M298T495	298.216	8.25	11.4	C11:db-UHQ aka 2-undecenyl-quinoloin-4(1H)-one position of double bond unknown	[M+H]+	0.9637	Cid_129846253	Organoheterocyclic_compounds	Quinolines_and_derivatives	Quinolones_and_derivatives	9.74692e+08	1.03849e+09	1.0134e+09	9.66333e+08	9.87324e+08	0.0297725	9.96048e+08
6	M167T634_2	167.07	10.56	0.9	3,5-Dimethoxycinnamic acid	[M+H-C2H2O]+	0.8941	Cid_5324677	Phenylpropanoids_and_polyketides	Cinnamic_acids_and_derivatives	Hydroxycinnamic_acids_and_derivatives	3.13079e+09	3.9302e+09	3.07328e+09	3.05805e+09	2.9551e+09	0.122869	3.22948e+09
7	M285T645_5	285.112	10.74	0.1	1,2-Propanediol, 1,2-dibenzoate	[M+H]+	0.9944	Cid_517637	Benzenoids	Benzene_and_substituted_derivatives	Benzoic_acids_and_derivatives	8.79906e+09	8.72866e+09	8.70754e+09	8.69544e+09	8.66224e+09	0.0058514	8.71859e+09
8	M137T668_3	137.133	11.13	0.3	Eucalyptol	[M+H-H2O]+	0.9981	Cid_2758	Organoheterocyclic_compounds	Oxanes	NA	3.59476e+09	2.87901e+09	3.09814e+09	3.31325e+09	2.7699e+09	0.10632	3.13101e+09
9	M257T677_3	257.081	11.28	1.9	Pinocembrin	[M+H]+	0.9871	Cid_68071	Phenylpropanoids_and_polyketides	Flavonoids	Flavans	2.22414e+09	2.2274e+09	2.14614e+09	2.21184e+09	2.05354e+09	0.0341935	2.17261e+09
10	M137T706_2	137.133	11.77	0.8	Decalin-2-carboxylic acid	[M+H-CH2O2]+	0.9977	Cid_656885	Organic_acids_and_derivatives	Carboxylic_acids_and_derivatives	Carboxylic_acids	2.75342e+09	2.70007e+09	2.67283e+09	2.89841e+09	2.67431e+09	0.0344793	2.73981e+09
11	M257T739_4	372.117	12.31	17.1	Isovalerylshikonin	[M+H]+	0.9895	Cid_479497	Benzenoids	Naphthalenes	Naphthoquinones	3.2939e+10	3.43564e+10	3.32465e+10	3.26622e+10	3.20986e+10	0.025364	3.30606e+10
12	M271T758_3	271.133	12.63	21.4	Difenpiramide	[M+H-H2O]+	0.7295	Cid_100472	Benzenoids	Benzene_and_substituted_derivatives	Biphenyls_and_derivatives	1.34371e+10	1.31168e+10	1.31183e+10	1.32748e+10	1.29755e+10	0.0133866	1.31845e+10
13	M303T430_4	303.217	7.17	0.3	Aleuritic acid	[M-H]-	0.9985	Cid_222178	Lipids_and_lipid_like_molecules	Fatty_Acyls	Fatty_acids_and_conjugates	1.53382e+09	1.25305e+09	1.12478e+09	1.11377e+09	9.87468e+08	0.172673	1.20258e+09
14	M181T481_3	181.05	8.02	3.4	Gallacetophenone-4'-methyl ether	[M-H]-	0.9889	Cid_12820	Organic_oxygen_compounds	Organooxygen_compounds	Carbonyl_compounds	9.84027e+08	8.18802e+08	8.79262e+08	8.29944e+08	7.97315e+08	0.0865669	8.6187e+08
15	M269T586_3	269.081	9.76	0.1	Echinatin	[M-H]-	0.915	Cid_6442675	Phenylpropanoids_and_polyketides	Linear_1_3_diarylpropanoids	Chalcones_and_dihydrochalcones	1.08005e+09	1.03971e+09	9.42036e+08	9.34737e+08	8.94171e+08	0.0798724	9.78141e+08
16	M565T599	245.338	9.98	5.3	Mandenol	[M-H]-	0.988	Cid_5282184	Lipids and lipid-like molecules	Fatty Acyls	Lineolic acids and derivatives	5.57367e+09	3.53694e+09	1.68172e+09	1.0322e+09	3.28521e+09	0.587337	3.02195e+09
17	M283T645_5	283.098	10.74	21.6	Curculigoside	[M-H-C9H10O4]-	0.8576	Cid_158845	Organic_oxygen_compounds	Organooxygen_compounds	Carbohydrates_and_carbohydrate_conjugates	7.71149e+09	7.058e+09	6.85013e+09	6.53444e+09	6.23891e+09	0.0814102	6.87859e+09
18	M549T705_1	398.344	11.74	6.81	Daidzein	[M-H]-	0.993	Cid_5281708	Phenylpropanoids and polyketides	Isoflavonoids	Isoflav-2-enes	1.30496e+09	1.28903e+09	1.23513e+09	1.12813e+09	9.26154e+08	0.132762	1.17668e+09
19	M269T728_3	269.082	12.13	0.3	Cryptostrobin	[M-H]-	0.9949	Cid_6453244	Phenylpropanoids_and_polyketides	Flavonoids	Flavans	5.95062e+08	5.78348e+08	5.88924e+08	5.11756e+08	4.65976e+08	0.103435	5.48013e+08
20	M243T749_1	243.196	12.35	1	14-Hydroxymyristic acid	[M-H]-	0.997	Cid_3084276	Lipids_and_lipid_like_molecules	Fatty_Acyls	Fatty_acids_and_conjugates	4.41477e+08	4.21328e+08	3.45436e+08	3.54376e+08	3.40494e+08	0.123911	3.80622e+08
21	M271T821_2	271.227	13.68	0.1	3-Hydroxypalmitic acid	[M-H]-	0.9972	Cid_301590	Lipids and lipid-like molecules	Fatty Acyls	Fatty acids and conjugates	2.11352e+09	1.06388e+09	1.84806e+09	1.02746e+09	1.05701e+09	0.364885	1.42198e+09
	M447T300	447.129	5	0.2	Calycosin-7-o-beta-d-glucoside	[M+H]+	0.9993	Cid_5318267	Phenylpropanoids_and_polyketides	Isoflavonoids	Isoflavonoid_O_glycosides	7.49423e+07	7.39672e+07	6.83529e+07	6.45311e+07	6.97419e+07	0.0605044	7.03071e+07
	M317T566	317.139	9.43	0.1	Loureirin b	[M+H]+	0.9951	Cid_189670	Phenylpropanoids_and_polyketides	Linear_1_3_diarylpropanoids	Chalcones_and_dihydrochalcones	3.66581e+07	3.7675e+07	3.66083e+07	3.66145e+07	4.064e+07	0.0461726	3.76392e+07
	M91T739	91.0544	12.32	8.7	Phenylcarbinol	[M+H-H2O]+	0.9968	Cid_244	Benzenoids	Benzene_and_substituted_derivatives	Benzyl_alcohols	6.58973e+07	6.1988e+07	7.03116e+07	6.46716e+07	5.03167e+07	0.119971	6.2637e+07
	M95T668	95.0863	11.13	6.1	exo-Norborneol	[M+H-H2O]+	0.9895	Cid_79028	Lipids_and_lipid_like_molecules	Prenol_lipids	Monoterpenoids	4.08995e+08	3.31502e+08	3.23892e+08	3.91299e+08	3.96072e+08	0.106829	3.70352e+08
	M96T51	96.0449	0.84	4.9	3-Pyridol	[M+H]+	0.9989	Cid_7971	Organoheterocyclic_compounds	Pyridines_and_derivatives	Hydroxypyridines	3.64985e+07	3.40033e+07	3.45129e+07	3.36266e+07	3.39639e+07	0.0333102	3.4521e+07
	M100T125_3	100.076	2.09	4.6	N-Boc-2-piperidone	[M+H-C5H8O2]+	0.9992	Cid_7577838	Organoheterocyclic_compounds	Piperidines	Piperidinecarboxylic_acids_and_derivatives	3.50613e+08	3.20626e+08	3.28702e+08	3.17328e+08	3.20785e+08	0.0412757	3.27611e+08
	M100T1129	100.113	18.82	4.6	Cyclohexanamine	[M+H]+	0.9166	Cid_7965	Organic_nitrogen_compounds	Organonitrogen_compounds	Cyclohexylamines	1.10298e+07	7.61822e+06	8.90694e+06	8.17249e+06	7.33238e+06	0.171751	8.61197e+06
	M101T304	101.06	5.07	4.6	3,3-Dimethylacrylic acid	[M+H]+	0.8577	Cid_10931	Lipids_and_lipid_like_molecules	Fatty_Acyls	Fatty_acids_and_conjugates	3.4742e+07	2.84437e+07	2.92728e+07	3.02326e+07	2.67327e+07	0.100525	2.98848e+07
	M102T52_2	102.128	0.87	5	Triethylhexyammonium cation	[Cat-C6H12]+	0.9974	Cid_193021	Organic_nitrogen_compounds	Organonitrogen_compounds	Quaternary_ammonium_salts	1.6658e+09	1.75484e+09	1.70974e+09	1.71238e+09	1.75568e+09	0.0217325	1.71969e+09
	M104T43_3	104.107	0.72	3.4	Choline cation	[Cat]+	0.9963	Cid_305	Organic_nitrogen_compounds	Organonitrogen_compounds	Quaternary_ammonium_salts	3.60468e+09	3.55267e+09	3.43774e+09	3.46874e+09	3.46148e+09	0.0201449	3.50506e+09
	M105T587	105.033	9.78	3.3	N-(6-Amino-1-butyl-2,4-dioxo-1,2,3,4-tetrahydro-5-pyrimidinyl)-N-methylbenzamide	[M+H-C9H16N4O2]+	0.9725	Cid_8917951	Benzenoids	Benzene_and_substituted_derivatives	Benzoic_acids_and_derivatives	1.62357e+08	1.57344e+08	1.73501e+08	2.18838e+08	1.68425e+08	0.14005	1.76093e+08
	M105T664_1	105.033	11.07	4.1	N-(5-Phenethyl-[1,3,4]thiadiazol-2-yl)benzamide	[M+H-C10H11N3S]+	0.9668	Cid_821478	Benzenoids	Benzene_and_substituted_derivatives	Benzoic_acids_and_derivatives	1.7949e+08	1.58301e+08	1.71994e+08	1.74846e+08	1.78668e+08	0.0496668	1.7266e+08
	M105T177	105.071	2.95	4.4	JWH 251 3-methylphenyl isomer	[M+H-C14H17NO]+	0.988	Cid_91734833	Organoheterocyclic_compounds	Indoles_and_derivatives	Phenylacetylindoles	3.31766e+07	3.12413e+07	3.06983e+07	3.1336e+07	3.15141e+07	0.0296253	3.15933e+07
	M106T43_1	106.05	0.72	3.1	Serine	[M+H]+	0.9793	Cid_617	Organic_acids_and_derivatives	Carboxylic_acids_and_derivatives	Amino_acids__peptides__and_analogues	1.03487e+08	1.04008e+08	1.02245e+08	1.01073e+08	1.01545e+08	0.0122066	1.02472e+08
	M106T1129_2	106.087	18.82	4.1	Diethanolamine	[M+H]+	0.9771	Cid_8113	Organic_nitrogen_compounds	Organonitrogen_compounds	Amines	3.29376e+06	3.98358e+06	3.46241e+06	3.19474e+06	2.95217e+06	0.114281	3.37733e+06
	M109T47	109.029	0.78	4	5-[(2,3,4,5,6-Pentachlorophenoxy)methyl]furfural	[M+H-C6HCl5O]+	0.993	Cid_3252961	Benzenoids	Phenol_ethers	unknown	9.77e+07	9.53887e+07	7.81455e+07	1.0685e+08	1.06724e+08	0.120951	9.69616e+07
	M109T739	109.065	12.32	3.6	Testosterone	[M+H-C12H20O]+	0.8475	Cid_6013	Lipids_and_lipid_like_molecules	Steroids_and_steroid_derivatives	Androstane_steroids	2.70099e+08	2.85144e+08	2.72706e+08	2.88304e+08	2.84582e+08	0.0291884	2.80167e+08
	M109T597	109.101	9.95	3.1	4-Oxo-2-nonenal	[M+H-CH2O2]+	0.7841	Cid_6445537	Organic_oxygen_compounds	Organooxygen_compounds	Carbonyl_compounds	1.10279e+08	1.31408e+08	1.62039e+08	1.70912e+08	1.52581e+08	0.168715	1.45444e+08
	M116T43	116.035	0.72	2.8	Asparagine	[M+H-NH3]+	0.9262	Cid_6267	Organic_acids_and_derivatives	Carboxylic_acids_and_derivatives	Amino_acids__peptides__and_analogues	4.33818e+07	4.30285e+07	4.51856e+07	4.45043e+07	4.54707e+07	0.0243444	4.43142e+07
	M116T47_2	116.071	0.79	2.3	L-NG-Monomethylarginine	[M+H-C2H7N3]+	0.9997	Cid_132862	Organic_acids_and_derivatives	Carboxylic_acids_and_derivatives	Amino_acids__peptides__and_analogues	8.21005e+09	8.27975e+09	7.88241e+09	8.31001e+09	8.00048e+09	0.0229188	8.13654e+09
	M117T739	117.07	12.31	2.7	1-Cinnamylpiperazine	[M+H-C4H10N2]+	0.9982	Cid_726896	Benzenoids	Benzene_and_substituted_derivatives	Styrenes	3.81206e+08	4.1151e+08	3.86561e+08	3.81938e+08	3.88084e+08	0.0319447	3.8986e+08
	M117T523	117.07	8.72	2.5	trans-2-Phenylcyclopropylamine	[M+H-NH3]+	0.9981	Cid_19493	Organic_nitrogen_compounds	Organonitrogen_compounds	Amines	1.6064e+08	1.69337e+08	1.75467e+08	1.55616e+08	1.57066e+08	0.0519409	1.63625e+08
	M118T46_1	118.087	0.76	2.3	L-Valine	[M+H]+	0.9996	Cid_6287	Organic_acids_and_derivatives	Carboxylic_acids_and_derivatives	Amino_acids__peptides__and_analogues	1.46908e+09	1.61764e+09	1.5111e+09	1.50079e+09	1.57027e+09	0.0387842	1.53378e+09
	M118T65	118.087	1.09	2.5	Valine	[M+H]+	0.9978	Cid_1182	Organic_acids_and_derivatives	Carboxylic_acids_and_derivatives	Amino_acids__peptides__and_analogues	1.43934e+08	1.30503e+08	1.26004e+08	1.57881e+08	1.47909e+08	0.0920424	1.41246e+08
	M120T44	120.066	0.73	2.7	L-Homoserine	[M+H]+	0.9959	Cid_12647	Organic_acids_and_derivatives	Carboxylic_acids_and_derivatives	Amino_acids__peptides__and_analogues	5.32719e+08	5.35833e+08	4.9924e+08	5.17256e+08	4.94218e+08	0.0366494	5.15853e+08
	M120T128	120.081	2.13	2.4	2,2,4-Trimethyl-3,4-dihydro-1H-quinoline	[M+H-C4H8]+	0.9927	Cid_107292	Organoheterocyclic_compounds	Quinolines_and_derivatives	Hydroquinolines	9.46582e+07	9.92006e+07	1.02777e+08	9.70962e+07	9.33882e+07	0.038357	9.74241e+07
	M121T663	121.065	11.06	2.7	4,5-Dinitro-o-xylene	[M+H-N2O3]+	0.9902	Cid_69120	Benzenoids	Benzene_and_substituted_derivatives	Nitrobenzenes	7.51339e+07	9.4915e+07	9.89039e+07	8.65689e+07	1.07628e+08	0.133575	9.26299e+07
	M121T77	121.065	1.29	3.6	N-Acetyltyramine	[M+H-C2H5NO]+	0.9892	Cid_121051	Benzenoids	Phenols	1_hydroxy_2_unsubstituted_benzenoids	2.56485e+07	2.55361e+07	2.75358e+07	2.52161e+07	2.42953e+07	0.0461047	2.56464e+07
	M122T232	122.06	3.86	2.9	N-Benzoyl-N'-propylthiourea	[M+H-C4H7NS]+	0.9896	Cid_2246114	Benzenoids	Benzene_and_substituted_derivatives	Benzoic_acids_and_derivatives	6.18451e+07	6.03388e+07	5.52116e+07	5.97033e+07	5.84532e+07	0.04227	5.91104e+07
	M122T1131	122.081	18.85	2.3	Trometamol	[M+H]+	0.9908	Cid_6503	Organic_nitrogen_compounds	Organonitrogen_compounds	Amines	2.06913e+07	3.47658e+07	2.46622e+07	2.4868e+07	2.75158e+07	0.197106	2.65006e+07
	M122T177	122.097	2.95	3.4	N-(3-Chlorophenyl)-N'-(2-phenylethyl)urea	[M+H-C7H4ClNO]+	0.9306	Cid_791966	Benzenoids	Benzene_and_substituted_derivatives	N_phenylureas	2.0715e+07	2.02289e+07	1.92612e+07	1.97855e+07	1.88061e+07	0.0383037	1.97594e+07
	M123T739	123.044	12.31	0.7	5-[(2Z,8Z)-Pentadeca-2,8-dienyl]resorcinol	[M+H-C14H26]+	0.9048	Cid_45360333	Benzenoids	Phenols	Benzenediols	4.85829e+07	4.91812e+07	4.68577e+07	5.0338e+07	4.55828e+07	0.0392881	4.81085e+07
	M123T67	123.056	1.12	2.5	Picolinamide	[M+H]+	0.9879	Cid_15070	Organoheterocyclic_compounds	Pyridines_and_derivatives	Pyridinecarboxylic_acids_and_derivatives	5.49133e+07	4.20236e+07	5.40834e+07	5.55292e+07	4.44673e+07	0.128092	5.02034e+07
	M124T67_1	124.04	1.12	2.8	Nicotinic acid	[M+H]+	0.9994	Cid_938	Organoheterocyclic_compounds	Pyridines_and_derivatives	Pyridinecarboxylic_acids_and_derivatives	1.20694e+08	9.44981e+07	1.17728e+08	1.24943e+08	9.44345e+07	0.134196	1.10459e+08
	M125T739	125.06	12.31	1.8	Penicillic acid	[M+H-CH2O2]+	0.9869	Cid_1268111	Organic_acids_and_derivatives	Keto_acids_and_derivatives	Medium_chain_keto_acids_and_derivatives	2.10622e+08	2.10084e+08	2.01935e+08	2.0821e+08	2.03634e+08	0.0188792	2.06897e+08
	M129T67	129.066	1.11	1.7	Glutamimide	[M+H]+	0.9781	Cid_134508	Organic_acids_and_derivatives	Carboxylic_acids_and_derivatives	Amino_acids__peptides__and_analogues	8.82279e+07	7.58134e+07	8.79963e+07	9.60694e+07	9.63646e+07	0.0940594	8.88943e+07
	M130T69_3	130.05	1.15	1.1	DL-Pyroglutamic acid	[M+H]+	0.9995	Cid_499	Organic_acids_and_derivatives	Carboxylic_acids_and_derivatives	Amino_acids__peptides__and_analogues	7.86211e+08	7.80282e+08	7.90642e+08	7.78777e+08	8.14145e+08	0.0181028	7.90011e+08
	M130T52_1	130.087	0.86	1.8	Arginine, N2-methyl-	[M+H-CH5N3]+	0.943	Cid_73046	Organic_acids_and_derivatives	Carboxylic_acids_and_derivatives	Amino_acids__peptides__and_analogues	4.4399e+08	4.64816e+08	5.22186e+08	4.58768e+08	4.44187e+08	0.0691508	4.66789e+08
	M130T234	130.159	3.9	2.2	N,N-Dibutyl-N'-(3-chloro-2-methylphenyl)urea	[M+H-C8H6ClNO]+	0.7645	Cid_17381642	Benzenoids	Benzene_and_substituted_derivatives	N_phenylureas	3.41248e+07	3.23418e+07	3.16335e+07	3.33477e+07	3.34729e+07	0.0299708	3.29841e+07
	M132T44	132.066	0.74	2	Hydroxyproline	[M+H]+	0.9016	Cid_69248	Organic_acids_and_derivatives	Carboxylic_acids_and_derivatives	Amino_acids__peptides__and_analogues	2.56803e+08	2.565e+08	2.39332e+08	2.42869e+08	2.49114e+08	0.0316445	2.48924e+08
	M132T82_1	132.102	1.37	1.6	Leucine	[M+H]+	0.9999	Cid_6106	Organic_acids_and_derivatives	Carboxylic_acids_and_derivatives	Amino_acids__peptides__and_analogues	6.28072e+08	6.46426e+08	6.76145e+08	6.98876e+08	6.62435e+08	0.0410197	6.62391e+08
	M133T43_1	133.061	0.72	0.9	N-Acetylglucosaminylasparagine	[M+H-C8H13NO5]+	0.9981	Cid_91746260	Organic_acids_and_derivatives	Carboxylic_acids_and_derivatives	Amino_acids__peptides__and_analogues	1.20343e+09	1.16978e+09	1.17208e+09	1.15818e+09	1.16447e+09	0.014929	1.17359e+09
	M134T44	134.045	0.73	0.8	N-Acetyl-L-aspartic acid	[M+H-C2H2O]+	0.9752	Cid_65065	Organic_acids_and_derivatives	Carboxylic_acids_and_derivatives	Amino_acids__peptides__and_analogues	7.02373e+07	7.06565e+07	6.94669e+07	7.37734e+07	6.86588e+07	0.0276715	7.05586e+07
	M136T51	136.062	0.84	0.9	2'-O-Methyladenosine	[M+H-C6H10O4]+	0.9995	Cid_102213	Nucleosides__nucleotides__and_analogues	Purine_nucleosides	unknown	2.77989e+08	2.44691e+08	2.37531e+08	2.53805e+08	2.42133e+08	0.0640542	2.5123e+08
	M137T67	137.046	1.12	1.4	Hypoxanthine	[M+H]+	0.9996	Cid_135398638	Organoheterocyclic_compounds	Imidazopyrimidines	Purines_and_purine_derivatives	3.58057e+07	3.14864e+07	3.32925e+07	3.98922e+07	4.29822e+07	0.128736	3.66918e+07
	M137T757	137.06	12.62	1.2	Cannabidiorcol	[M+H-C9H14]+	0.9956	Cid_16657068	Lipids_and_lipid_like_molecules	Prenol_lipids	Monoterpenoids	8.98686e+07	9.05065e+07	8.59689e+07	9.11049e+07	9.43814e+07	0.033323	9.03661e+07
	M137T634	137.06	10.56	0.9	Atraric acid	[M+H-C2H4O2]+	0.9953	Cid_78435	Benzenoids	Benzene_and_substituted_derivatives	Benzoic_acids_and_derivatives	2.27792e+08	2.33533e+08	2.2831e+08	2.30325e+08	2.20282e+08	0.0214505	2.28048e+08
	M138T47	138.055	0.78	0.6	Trigonelline hcl	[M+H]+	0.9999	Cid_134606	Organoheterocyclic_compounds	Pyridines_and_derivatives	Pyridinecarboxylic_acids_and_derivatives	4.60101e+08	5.01437e+08	4.65922e+08	4.62259e+08	4.88041e+08	0.0384042	4.75552e+08
	M139T265	139.039	4.42	0.8	(-)-Catechin	[M+H-C8H8O3]+	0.9896	Cid_73160	Phenylpropanoids_and_polyketides	Flavonoids	Flavans	1.64618e+07	1.43853e+07	1.46062e+07	1.54678e+07	1.47691e+07	0.0557288	1.5138e+07
	M139T638	139.039	10.63	0.3	Methyl 5-(anilinomethyl)-2-furoate	[M+H-C6H7N]+	0.9828	Cid_751547	Organic_oxygen_compounds	Organooxygen_compounds	Carbohydrates_and_carbohydrate_conjugates	9.68221e+07	9.35698e+07	8.23023e+07	9.18222e+07	9.86675e+07	0.0687451	9.26368e+07
	M139T757	139.076	12.62	1.1	Griseophenone C	[M+H-C8H6O4]+	0.9267	Cid_23757122	Benzenoids	Benzene_and_substituted_derivatives	Benzophenones	9.52097e+07	9.10494e+07	8.85806e+07	8.5185e+07	9.46175e+07	0.0461549	9.09284e+07
	M139T747	139.112	12.46	0.9	Diethyl sebacate	[M+H-C5H12O3]+	0.7136	Cid_8049	Lipids_and_lipid_like_molecules	Fatty_Acyls	Fatty_acid_esters	6.75526e+07	5.47129e+07	6.70805e+07	6.6011e+07	6.09099e+07	0.0862908	6.32534e+07
	M141T588	141.054	9.81	0.3	3-Methoxycatechol	[M+H]+	0.9937	Cid_13622	Benzenoids	Phenols	Methoxyphenols	4.62649e+07	4.73635e+07	5.1184e+07	4.76424e+07	4.94584e+07	0.0401264	4.83826e+07
	M142T51	142.123	0.85	2.2	Tropine	[M+H]+	0.9954	Cid_8424	Alkaloids_and_derivatives	Tropane_alkaloids	unknown	4.27753e+07	4.65064e+07	4.38699e+07	5.01793e+07	4.12192e+07	0.0783895	4.491e+07
	M144T90	144.066	1.5	2.3	2-Aminoadipic acid	[M+H-H2O]+	0.8568	Cid_469	Organic_acids_and_derivatives	Carboxylic_acids_and_derivatives	Amino_acids__peptides__and_analogues	2.73255e+07	2.81845e+07	2.67649e+07	2.65923e+07	2.70725e+07	0.0229625	2.71879e+07
	M144T49	144.102	0.81	1.5	L-.beta.-Homolysine	[M+H-NH3]+	0.9658	Cid_2761529	Organic_acids_and_derivatives	Carboxylic_acids_and_derivatives	Amino_acids__peptides__and_analogues	2.73417e+08	2.73031e+08	2.83667e+08	3.09955e+08	3.08862e+08	0.0635544	2.89786e+08
	M145T1195	145.05	19.92	1.8	(3E)-3-Hexenedioic acid	[M+H]+	0.9247	Cid_5351896	Lipids_and_lipid_like_molecules	Fatty_Acyls	Fatty_acids_and_conjugates	3.22383e+08	3.44193e+08	2.40096e+08	2.79386e+08	3.02254e+08	0.134854	2.97662e+08
	M146T52	146.093	0.86	0.7	4-Guanidinobutyric acid	[M+H]+	0.9903	Cid_500	Organic_acids_and_derivatives	Carboxylic_acids_and_derivatives	Amino_acids__peptides__and_analogues	2.67172e+08	2.86168e+08	2.51359e+08	2.35824e+08	2.31242e+08	0.0892842	2.54353e+08
	M147T664	147.044	11.06	0.2	Sinapine cation	[Cat-C7H17NO3]+	0.99	Cid_89287	Phenylpropanoids_and_polyketides	Cinnamic_acids_and_derivatives	Hydroxycinnamic_acids_and_derivatives	8.95635e+07	1.20551e+08	1.15748e+08	1.13638e+08	7.75931e+07	0.181471	1.03419e+08
	M147T44	147.077	0.73	1	Pro-Gln	[M+H-C5H7NO]+	0.9971	Cid_7408109	Organic_acids_and_derivatives	Carboxylic_acids_and_derivatives	Amino_acids__peptides__and_analogues	1.18865e+08	1.27762e+08	1.42411e+08	1.42141e+08	1.4071e+08	0.0788723	1.34378e+08
	M147T731	147.081	12.19	0.9	1-(4-Methoxyphenyl)acetone	[M+H-H2O]+	0.9883	Cid_31231	Benzenoids	Benzene_and_substituted_derivatives	Phenylpropanes	2.93617e+07	3.14578e+07	3.12667e+07	3.0868e+07	2.86576e+07	0.0409692	3.03224e+07
	M147T39	147.114	0.65	1.3	D-Homoproline	[M+NH4]+	0.846	Cid_736316	Organic_acids_and_derivatives	Carboxylic_acids_and_derivatives	Amino_acids__peptides__and_analogues	2.49383e+07	2.46998e+07	2.52904e+07	2.68999e+07	2.8192e+07	0.0574783	2.60041e+07
	M148T45	148.061	0.74	0.6	ZJ 43	[M+H-C7H11NO3]+	0.977	Cid_11722553	Organic_acids_and_derivatives	Carboxylic_acids_and_derivatives	Amino_acids__peptides__and_analogues	9.97749e+07	1.04167e+08	1.00461e+08	9.83546e+07	1.07081e+08	0.0350578	1.01968e+08
	M149T863	149.022	14.39	1.5	N-(5-tert-Butyl-3-isoxazolyl)-1,3-benzodioxole-5-carboxamide	[M+H-C7H12N2O]+	0.998	Cid_17191186	Organoheterocyclic_compounds	Benzodioxoles	unknown	3.69938e+08	3.78059e+08	3.53061e+08	3.57346e+08	2.20047e+08	0.194842	3.3569e+08
	M151T663	151.075	11.06	10.1	2-Methylamino-5-nitroaniline	[M+H-OH]+	0.8174	Cid_3420025	Benzenoids	Benzene_and_substituted_derivatives	Nitrobenzenes	1.01804e+08	1.12612e+08	1.04985e+08	1.04263e+08	6.9886e+07	0.168294	9.871e+07
	M152T51	152.057	0.85	1.3	Valganciclovir	[M+H-C9H17NO4]+	0.9985	Cid_135413535	Organic_acids_and_derivatives	Carboxylic_acids_and_derivatives	Amino_acids__peptides__and_analogues	4.79023e+07	5.97431e+07	4.76838e+07	5.10256e+07	5.80626e+07	0.10746	5.28835e+07
	M152T74	152.057	1.23	0.9	Guanine	[M+H]+	0.9954	Cid_135398634	Organoheterocyclic_compounds	Imidazopyrimidines	Purines_and_purine_derivatives	4.71018e+07	4.94522e+07	4.90402e+07	4.86263e+07	5.40954e+07	0.053	4.96632e+07
	M153T68	153.041	1.13	1.1	Xanthine	[M+H]+	0.9355	Cid_1188	Organoheterocyclic_compounds	Imidazopyrimidines	Purines_and_purine_derivatives	1.89419e+07	1.67294e+07	1.81717e+07	1.98781e+07	2.0249e+07	0.0750782	1.8794e+07
	M153T739_3	153.054	12.31	0.5	cis-1,2,3,6-Tetrahydrophthalic anhydride	[M+H]+	0.9644	Cid_98495	Organoheterocyclic_compounds	Isobenzofurans	unknown	9.58913e+09	9.67284e+09	9.46263e+09	9.46459e+09	9.33265e+09	0.0137562	9.50437e+09
	M153T791	153.054	13.18	9.5	6-Methoxy-3-nitro-2-pyridinamine	[M+H-OH]+	0.8259	Cid_3852428	Organic_1_3_dipolar_compounds	Allyl_type_1_3_dipolar_organic_compounds	Organic_nitro_compounds	8.79419e+07	7.93712e+07	9.03331e+07	6.72008e+07	8.09518e+07	0.111616	8.11598e+07
	M155T634	155.07	10.56	0.3	2-Hydroxy-3-methoxy-4-(1-methoxypropan-2-yl)-2H-furan-5-one	[M+H-CH4O2]+	0.9934	Cid_129008942	Organoheterocyclic_compounds	Dihydrofurans	Furanones	2.35346e+08	2.44175e+08	2.26631e+08	2.28842e+08	2.19324e+08	0.0406598	2.30864e+08
	M155T672_2	155.071	11.2	0.3	2,6-Dimethoxyphenol	[M+H]+	0.9739	Cid_7041	Benzenoids	Phenols	Methoxyphenols	9.30229e+07	7.13242e+07	6.72825e+07	6.94789e+07	6.69412e+07	0.149384	7.361e+07
	M156T40	156.077	0.67	1	Histidine	[M+H]+	0.9984	Cid_773	Organic_acids_and_derivatives	Carboxylic_acids_and_derivatives	Amino_acids__peptides__and_analogues	1.13935e+08	1.15012e+08	1.42194e+08	1.41419e+08	1.59188e+08	0.145056	1.3435e+08
	M158T68	158.092	1.13	1.2	DL-Arginine	[M+H-NH3]+	0.8715	Cid_232	Organic_acids_and_derivatives	Carboxylic_acids_and_derivatives	Amino_acids__peptides__and_analogues	3.19812e+07	3.24102e+07	3.25694e+07	3.15888e+07	3.40393e+07	0.0286841	3.25178e+07
	M159T44_2	159.077	0.73	1.3	L-Citrulline	[M+H-NH3]+	0.7282	Cid_9750	Organic_acids_and_derivatives	Carboxylic_acids_and_derivatives	Amino_acids__peptides__and_analogues	2.89093e+07	2.37262e+07	2.82261e+07	2.49586e+07	2.38204e+07	0.0952547	2.59281e+07
	M159T610	159.117	10.17	0.8	Pregnenolone	[M+H-C9H18O2]+	0.887	Cid_8955	Lipids_and_lipid_like_molecules	Steroids_and_steroid_derivatives	Pregnane_steroids	5.8107e+07	4.4027e+07	3.8615e+07	4.60475e+07	5.29399e+07	0.159593	4.79473e+07
	M162T42	162.076	0.7	0.8	D-Mannosamine	[M+H-H2O]+	0.9652	Cid_123961	Organic_oxygen_compounds	Organooxygen_compounds	Carbohydrates_and_carbohydrate_conjugates	3.77919e+07	3.58327e+07	3.99672e+07	3.88272e+07	4.212e+07	0.0604791	3.89078e+07
	M162T45_2	162.113	0.75	0.7	L-Carnitine	[M+H]+	0.9913	Cid_10917	Organic_nitrogen_compounds	Organonitrogen_compounds	Quaternary_ammonium_salts	4.7338e+07	5.18048e+07	4.95243e+07	4.92173e+07	4.96321e+07	0.0320748	4.95033e+07
	M163T358	163.039	5.97	0.8	Butein	[M+H-C6H6O2]+	0.9464	Cid_5281222	Phenylpropanoids_and_polyketides	Linear_1_3_diarylpropanoids	Chalcones_and_dihydrochalcones	2.9357e+07	2.74535e+07	2.81136e+07	2.71743e+07	3.07797e+07	0.0522142	2.85756e+07
	M163T39	163.11	0.65	1.3	L-Hydroxylysine	[M+H]+	0.9112	Cid_3032849	Organic_acids_and_derivatives	Carboxylic_acids_and_derivatives	Amino_acids__peptides__and_analogues	1.20767e+07	1.09081e+07	1.09013e+07	1.04721e+07	1.27851e+07	0.0844278	1.14286e+07
	M165T759	165.055	12.65	21.6	2-Chloro-N-(3-chloro-4-fluorophenyl)propanamide	[M+H-HCl2]+	0.9389	Cid_11579565	Benzenoids	Benzene_and_substituted_derivatives	Anilides	3.35914e+07	3.52922e+07	4.09239e+07	3.48212e+07	3.20082e+07	0.0955843	3.53274e+07
	M166T128	166.087	2.13	19	Phenylalanine	[M+H]+	0.9968	Cid_6140	Organic_acids_and_derivatives	Carboxylic_acids_and_derivatives	Amino_acids__peptides__and_analogues	1.94823e+08	2.05228e+08	2.13084e+08	1.99974e+08	2.04583e+08	0.0332967	2.03538e+08
	M167T606	167.07	10.11	0.8	Methyl (2E)-3-(1-hydroxy-6-methoxy-4-oxocyclohex-2-en-1-yl)prop-2-enoate	[M+H-C2H4O2]+	0.9583	Cid_129008923	Lipids_and_lipid_like_molecules	Fatty_Acyls	Fatty_acid_esters	7.32928e+08	8.51794e+08	8.66605e+08	7.26994e+08	7.30789e+08	0.0906361	7.81822e+08
	M167T758_1	167.07	12.63	0.7	trans-2,4-Dimethoxycinnamic acid	[M+H-C2H2O]+	0.9385	Cid_734009	Phenylpropanoids_and_polyketides	Cinnamic_acids_and_derivatives	Cinnamic_acids	4.52596e+09	4.44478e+09	4.41479e+09	4.43329e+09	4.64183e+09	0.0208941	4.49213e+09
	M167T846	167.071	14.1	1	Chlamydospordiol	[M+H-C2H6O2]+	0.8558	Cid_190904	Organoheterocyclic_compounds	Pyrans	Pyranones_and_derivatives	4.7874e+07	5.27444e+07	4.98672e+07	4.83574e+07	4.71294e+07	0.0451843	4.91945e+07
	M167T820	167.143	13.67	1.6	11-Hydroxyundecanoic acid	[M+H-2H2O]+	0.7886	Cid_77237	Organic_acids_and_derivatives	Hydroxy_acids_and_derivatives	Medium_chain_hydroxy_acids_and_derivatives	4.48607e+07	6.10311e+07	3.94752e+07	5.79893e+07	4.27254e+07	0.196088	4.92163e+07
	M169T119_1	169.097	1.98	1.1	3-Methylhexahydropyrrolo[1,2-a]pyrazine-1,4-dione	[M+H]+	0.9977	Cid_6428987	Organic_acids_and_derivatives	Carboxylic_acids_and_derivatives	Amino_acids__peptides__and_analogues	3.25189e+08	3.39275e+08	3.18e+08	3.29021e+08	3.29325e+08	0.0234902	3.28162e+08
	M171T52_1	171.077	0.86	1	Gly-Hyp-OH	[M+H-H2O]+	0.993	Cid_11862108	Organic_acids_and_derivatives	Carboxylic_acids_and_derivatives	Amino_acids__peptides__and_analogues	1.50879e+08	1.62203e+08	1.59937e+08	1.55159e+08	1.97527e+08	0.112785	1.65141e+08
	M171T206	171.113	3.44	1.2	N-Cyclohexyl-N'-[3-(4-morpholinyl)propyl]urea	[M+H-C6H13N]+	0.793	Cid_1987766	Organoheterocyclic_compounds	Oxazinanes	Morpholines	1.03197e+08	9.9663e+07	1.00944e+08	1.05788e+08	1.07724e+08	0.0322083	1.03463e+08
	M175T40_2	175.119	0.67	1.2	Arginine	[M+H]+	0.9906	Cid_6322	Organic_acids_and_derivatives	Carboxylic_acids_and_derivatives	Amino_acids__peptides__and_analogues	5.30926e+08	5.00313e+08	5.7078e+08	5.62405e+08	5.9679e+08	0.0676473	5.52243e+08
	M177T321	177.055	5.34	1.2	Ferulic acid	[M+H-H2O]+	0.8932	Cid_445858	Phenylpropanoids_and_polyketides	Cinnamic_acids_and_derivatives	Hydroxycinnamic_acids_and_derivatives	1.44435e+07	1.38044e+07	1.36496e+07	1.42477e+07	1.64411e+07	0.0773238	1.45172e+07
	M177T681	177.091	11.35	1.7	Ivabradine	[M+H-C16H24N2O3]+	0.9957	Cid_132999	Organoheterocyclic_compounds	Benzazepines	unknown	4.82884e+07	4.93412e+07	4.7583e+07	4.79349e+07	4.75418e+07	0.0153189	4.81379e+07
	M179T664_2	179.07	11.07	1.2	(4-Acetyl-2-methoxyphenoxy)acetic acid	[M+H-CH2O2]+	0.9147	Cid_717524	Organic_oxygen_compounds	Organooxygen_compounds	Carbonyl_compounds	2.40993e+09	2.32969e+09	3.15294e+09	2.52756e+09	2.14756e+09	0.152472	2.51354e+09
	M180T42	180.087	0.7	0.9	D-Glucosamine	[M+H]+	0.9599	Cid_3034366	Organic_oxygen_compounds	Organooxygen_compounds	Carbohydrates_and_carbohydrate_conjugates	3.08027e+07	2.95325e+07	3.35389e+07	3.13253e+07	3.27913e+07	0.0504482	3.15981e+07
	M181T690	181.085	11.5	0.8	Isoasaron	[M+H-C2H4]+	0.9168	Cid_636822	Benzenoids	Phenol_ethers	Anisoles	3.00342e+08	3.0235e+08	2.8427e+08	2.99434e+08	2.97609e+08	0.024293	2.96801e+08
	M181T718	181.085	11.97	0.6	2,4,6-Trimethoxyamphetamine	[M+H-C2H7N]+	0.97	Cid_31015	Benzenoids	Benzene_and_substituted_derivatives	Phenethylamines	5.53569e+08	5.02832e+08	5.24608e+08	5.15914e+08	5.37509e+08	0.0371076	5.26887e+08
	M181T282	181.086	4.71	1.6	Zinndiol	[M+H-C5H12O3]+	0.9581	Cid_10380050	Benzenoids	Benzene_and_substituted_derivatives	Benzyl_alcohols	1.10688e+07	1.06513e+07	1.0906e+07	1.09024e+07	1.07707e+07	0.0144906	1.08598e+07
	M181T543	181.086	9.05	0.9	cis-Asarone	[M+H-C2H4]+	0.9724	Cid_5281758	Benzenoids	Phenol_ethers	Anisoles	2.60468e+07	2.97034e+07	2.54307e+07	2.44287e+07	2.77087e+07	0.0778341	2.66637e+07
	M181T821	181.159	13.68	1	.gamma.-Dodecalactone	[M+H-H2O]+	0.877	Cid_16821	Organoheterocyclic_compounds	Lactones	Gamma_butyrolactones	5.25925e+07	5.30288e+07	3.73794e+07	4.90593e+07	3.65031e+07	0.178498	4.57126e+07
	M185T356	185.115	5.93	11.9	2-[5-[2-[2-[5-(2-Hydroxypropyl)oxolan-2-yl]propanoyloxy]propyl]oxolan-2-yl]propanoic acid	[M+H-C10H18O4]+	0.8408	Cid_23815283	Organic_acids_and_derivatives	Carboxylic_acids_and_derivatives	Dicarboxylic_acids_and_derivatives	5.35678e+07	5.27752e+07	5.21759e+07	5.28666e+07	5.14643e+07	0.0150488	5.257e+07
	M185T252	185.13	4.2	1	Cyclo(alanylleucyl)	[M+H]+	0.8235	Cid_3634567	Organic_acids_and_derivatives	Carboxylic_acids_and_derivatives	Amino_acids__peptides__and_analogues	1.94006e+07	1.97602e+07	1.94473e+07	2.04054e+07	1.9867e+07	0.0204399	1.97761e+07
	M187T67	187.072	1.11	1.1	Pyroglutamylglycine	[M+H]+	0.7121	Cid_152981	Organic_acids_and_derivatives	Carboxylic_acids_and_derivatives	Amino_acids__peptides__and_analogues	3.58319e+07	3.20009e+07	3.31724e+07	3.60312e+07	3.8603e+07	0.0739471	3.51279e+07
	M187T52	187.072	0.87	20.5	2,2'-Dihydroxybiphenyl	[M+H]+	0.7032	Cid_15731	Benzenoids	Benzene_and_substituted_derivatives	Biphenyls_and_derivatives	4.38739e+07	4.52532e+07	4.7012e+07	3.63108e+07	4.9938e+07	0.114588	4.44776e+07
	M188T198	188.071	3.3	1.4	3-Indolyllactic acid	[M+H-H2O]+	0.9767	Cid_92904	Organoheterocyclic_compounds	Indoles_and_derivatives	Indolyl_carboxylic_acids_and_derivatives	4.19063e+07	3.87332e+07	3.98164e+07	4.17671e+07	3.93049e+07	0.0359788	4.03056e+07
	M190T70	190.071	1.17	0.7	N-Acetyl-L-glutamic acid	[M+H]+	0.9967	Cid_70914	Organic_acids_and_derivatives	Carboxylic_acids_and_derivatives	Amino_acids__peptides__and_analogues	2.33445e+07	2.39537e+07	2.26886e+07	2.12103e+07	2.40034e+07	0.0500875	2.30401e+07
	M191T395	191.069	6.58	0.4	4-Methylherniarin	[M+H]+	0.9952	Cid_390807	Phenylpropanoids_and_polyketides	Coumarins_and_derivatives	unknown	2.39255e+07	2.25523e+07	2.2909e+07	2.28369e+07	2.4435e+07	0.03456	2.33317e+07
	M191T767	191.107	12.79	0.5	Ligustilide A	[M+H]+	0.9957	Cid_5319022	Organoheterocyclic_compounds	Isobenzofurans	unknown	2.64316e+08	2.26781e+08	2.47377e+08	2.22523e+08	2.56611e+08	0.0751541	2.43522e+08
	M195T535	195.065	8.92	12.6	9-(Methylamino)-1H-phenalen-1-one	[M+H-CH3]+	0.9578	Cid_144350	Benzenoids	Phenalenes	Phenalenones	8.5732e+07	7.99035e+07	8.18929e+07	7.82793e+07	7.88239e+07	0.0373282	8.09263e+07
	M195T43	195.088	0.72	1.1	Gly-His-Lys	[M+H-C6H14N2O2]+	0.9613	Cid_73587	Organic_acids_and_derivatives	Carboxylic_acids_and_derivatives	Amino_acids__peptides__and_analogues	1.26563e+08	1.16612e+08	1.09764e+08	1.19228e+08	1.14664e+08	0.0528187	1.17366e+08
	M195T743	195.1	12.38	14	(2E)-4-Hydroxynon-2-enoic acid	[M+Na]+	0.863	Cid_10442150	Organic_acids_and_derivatives	Hydroxy_acids_and_derivatives	Medium_chain_hydroxy_acids_and_derivatives	4.1385e+08	4.19385e+08	4.20345e+08	4.26471e+08	4.05394e+08	0.0189982	4.17089e+08
	M195T178	195.113	2.97	1.7	(5aR,10aR)-Octahydrodipyrrolo[1,2-a:1',2'-d]pyrazine-5,10-dione	[M+H]+	0.9729	Cid_6932481	Organic_acids_and_derivatives	Carboxylic_acids_and_derivatives	Amino_acids__peptides__and_analogues	9.42123e+07	8.99231e+07	8.86481e+07	8.99391e+07	8.7051e+07	0.0295519	8.99547e+07
	M197T331	197.081	5.52	1.1	6-[(E)-3,4-Dihydroxypent-1-enyl]pyran-2-one	[M+H]+	0.8895	Cid_45359427	Organoheterocyclic_compounds	Pyrans	Pyranones_and_derivatives	3.00093e+07	3.20582e+07	3.07543e+07	2.99692e+07	2.96057e+07	0.0320326	3.04794e+07
	M197T228	197.129	3.8	1.1	Propenyl-L-NIO	[M+H-NH3]+	0.9259	Cid_10198252	Organic_acids_and_derivatives	Carboxylic_acids_and_derivatives	Amino_acids__peptides__and_analogues	2.92411e+07	2.4119e+07	2.26259e+07	2.52934e+07	2.44523e+07	0.098777	2.51464e+07
	M201T51	201.087	0.85	18.8	Celastrol	[M+H-C16H26O2]+	0.732	Cid_122724	Lipids_and_lipid_like_molecules	Prenol_lipids	Triterpenoids	3.72739e+08	4.14583e+08	4.0062e+08	3.98062e+08	4.18249e+08	0.0447897	4.0085e+08
	M205T198	205.097	3.29	1.5	L-Tryptophan	[M+H]+	0.9894	Cid_6305	Organoheterocyclic_compounds	Indoles_and_derivatives	Indolyl_carboxylic_acids_and_derivatives	4.45778e+07	4.43991e+07	4.45769e+07	4.78893e+07	4.35487e+07	0.0371413	4.49984e+07
	M205T224	205.097	3.73	1.4	Gly-Phe-Phe	[M+H-C9H11NO2]+	0.9156	Cid_83153	Organic_acids_and_derivatives	Carboxylic_acids_and_derivatives	Amino_acids__peptides__and_analogues	4.66379e+07	4.54409e+07	4.47853e+07	4.7114e+07	4.54291e+07	0.0209385	4.58814e+07
	M207T79	207.098	1.31	1.8	Thr-Ser	[M+H]+	0.8025	Cid_7016064	Organic_acids_and_derivatives	Carboxylic_acids_and_derivatives	Amino_acids__peptides__and_analogues	1.50181e+07	1.45126e+07	1.61088e+07	1.5552e+07	1.63392e+07	0.0487374	1.55061e+07
	M207T401	207.102	6.68	1.5	p-Methoxytodadiol	[M+H-2H2O]+	0.9444	Cid_129913	Benzenoids	Phenol_ethers	Anisoles	1.71522e+07	1.68066e+07	1.68018e+07	1.74907e+07	1.7741e+07	0.0241981	1.71984e+07
	M209T369	209.081	6.16	1.4	trans-3,5-Dimethoxy-4-hydroxycinnamaldehyde	[M+H]+	0.9356	Cid_5280802	Benzenoids	Phenols	Methoxyphenols	3.86303e+07	3.88102e+07	3.65596e+07	3.91834e+07	3.77799e+07	0.0274354	3.81927e+07
	M209T747	209.19	12.36	1.2	14-Hydroxymyristic acid	[M+H-2H2O]+	0.9751	Cid_3084276	Lipids_and_lipid_like_molecules	Fatty_Acyls	Fatty_acids_and_conjugates	7.41008e+08	7.40161e+08	7.4542e+08	7.2961e+08	6.83633e+08	0.0349653	7.27966e+08
	M211T300	211.144	5	0.8	L,L-Cyclo(leucylprolyl)	[M+H]+	0.9856	Cid_7074739	Organic_acids_and_derivatives	Carboxylic_acids_and_derivatives	Amino_acids__peptides__and_analogues	3.9456e+07	3.6713e+07	3.77399e+07	3.6907e+07	3.98954e+07	0.038286	3.81423e+07
	M211T286	211.144	4.76	1.1	Cyclo(leucylprolyl)	[M+H]+	0.9937	Cid_102892	Organic_acids_and_derivatives	Carboxylic_acids_and_derivatives	Amino_acids__peptides__and_analogues	4.41192e+07	4.118e+07	3.99266e+07	4.10153e+07	4.42973e+07	0.0469776	4.21077e+07
	M215T431	215.18	7.18	1.5	4-Hydroxy-6-[2-(2-methyl-1,2,4a,5,6,7,8,8a-octahydronaphthalen-1-yl)ethyl]oxan-2-one	[M+H-C2H6O3]+	0.9867	Cid_45359535	Organoheterocyclic_compounds	Lactones	Delta_valerolactones	2.75414e+07	2.8305e+07	3.01507e+07	2.56915e+07	2.71028e+07	0.0591161	2.77583e+07
	M217T240	217.098	4	13.4	L-1,2,3,4-Tetrahydro-beta-carboline-3-carboxylic acid	[M+H]+	0.7658	Cid_98285	Organoheterocyclic_compounds	Indoles_and_derivatives	Pyridoindoles	8.53556e+06	8.31248e+06	8.68739e+06	8.27348e+06	7.89624e+06	0.0360181	8.34103e+06
	M217T748	217.159	12.46	1.1	6-Hydroxy-4-(hydroxymethyl)-3,4a,8,8-tetramethyl-5,6,7,8a-tetrahydro-4H-naphthalen-1-one	[M+H-2H2O]+	0.9912	Cid_45359318	Organic_oxygen_compounds	Organooxygen_compounds	Carbonyl_compounds	3.33539e+07	3.66585e+07	3.65065e+07	3.56952e+07	3.24416e+07	0.054946	3.49312e+07
	M219T618	219.138	10.3	0.8	trans-C 75	[M+H-2H2O]+	0.8172	Cid_6482234	Organoheterocyclic_compounds	Lactones	Gamma_butyrolactones	3.14582e+07	4.23048e+07	4.00964e+07	3.33456e+07	2.8821e+07	0.163534	3.52052e+07
	M219T820	219.211	13.67	1.5	Juniperic acid	[M+H-3H2O]+	0.9777	Cid_10466	Lipids_and_lipid_like_molecules	Fatty_Acyls	Fatty_acids_and_conjugates	3.20196e+08	3.07968e+08	2.26933e+08	2.99466e+08	2.21243e+08	0.171699	2.75161e+08
	M221T834	221.154	13.89	1.1	2,6-Di-tert-butylbenzoquinone	[M+H]+	0.7595	Cid_12867	Lipids_and_lipid_like_molecules	Prenol_lipids	Monoterpenoids	9.01858e+07	8.76026e+07	8.73667e+07	8.62418e+07	8.71522e+07	0.0168391	8.77098e+07
	M225T766	225.185	12.76	1.4	5-Tetradecynoic acid	[M+H]+	0.7787	Cid_5312707	Lipids_and_lipid_like_molecules	Fatty_Acyls	Fatty_acids_and_conjugates	3.946e+07	3.73227e+07	3.44378e+07	3.45435e+07	3.36717e+07	0.0677414	3.58871e+07
	M227T139	227.103	2.32	1.2	PyroGlu-Pro	[M+H]+	0.868	Cid_13306588	Organic_acids_and_derivatives	Carboxylic_acids_and_derivatives	Amino_acids__peptides__and_analogues	3.36984e+07	3.42255e+07	3.49143e+07	3.66291e+07	3.35716e+07	0.0360516	3.46078e+07
	M227T291	227.107	4.85	1.4	4,6-Dihydroxy-5a-methyl-3-methylidene-2-oxododecahydronaphtho[1,2-b]furan-9-carbaldehyde	[M+H-3H2O]+	0.8852	Cid_45783172	Lipids_and_lipid_like_molecules	Prenol_lipids	Terpene_lactones	2.38386e+07	2.38717e+07	2.45124e+07	2.30128e+07	2.53879e+07	0.0366569	2.41247e+07
	M227T733	227.107	12.21	1.1	3-Methoxy-4-(3-methylbut-2-enyl)-5-[(E)-styryl]phenol	[M+H-C5H8]+	0.9447	Cid_6446720	Phenylpropanoids_and_polyketides	Stilbenes	unknown	9.69523e+07	1.03595e+08	9.74148e+07	9.84856e+07	9.35164e+07	0.0371731	9.79927e+07
	M227T242	227.139	4.03	16.4	Hepasil	[M+H-2H2O]+	0.8392	Cid_71170	Lipids_and_lipid_like_molecules	Prenol_lipids	Monoterpenoids	1.21323e+08	1.1661e+08	1.25515e+08	1.21353e+08	1.15461e+08	0.033856	1.20052e+08
	M229T250	229.123	4.16	1.5	(9,9b-Dihydroxy-6,6,9a-trimethyl-1-oxo-3,5,5a,7,8,9-hexahydrobenzo[e][2]benzofuran-5-yl) hexanoate	[M+H-C6H16O4]+	0.8503	Cid_45359480	Organoheterocyclic_compounds	Naphthofurans	unknown	2.4155e+07	2.4051e+07	2.42494e+07	2.68645e+07	2.57817e+07	0.0500122	2.50203e+07
	M230T1130_2	230.248	18.84	0.5	N,N-Dimethyldodecylamine N-oxide	[M+H]+	0.9794	Cid_15433	Organic_nitrogen_compounds	Organonitrogen_compounds	Aminoxides	6.30835e+06	9.28905e+06	6.7909e+06	6.22611e+06	6.23842e+06	0.188917	6.97057e+06
	M231T574	231.138	9.57	1.1	Graveolide	[M+H-H2O]+	0.8374	Cid_11043090	Lipids_and_lipid_like_molecules	Prenol_lipids	Terpene_lactones	2.46e+08	2.46836e+08	2.48254e+08	2.42337e+08	2.3379e+08	0.0239168	2.43443e+08
	M231T508	231.138	8.47	0.6	Strobilactone A	[M+H-2H2O]+	0.9131	Cid_23955806	Organoheterocyclic_compounds	Naphthofurans	unknown	4.63418e+07	4.81288e+07	4.62681e+07	4.72059e+07	4.5601e+07	0.0209207	4.67091e+07
	M231T756	231.138	12.6	1.1	8-Methoxyatractylenolide I	[M+H-CH4O]+	0.8715	Cid_75368731	Lipids_and_lipid_like_molecules	Prenol_lipids	Terpene_lactones	5.24209e+07	4.22474e+07	5.74554e+07	3.92895e+07	3.79986e+07	0.187335	4.58824e+07
	M232T1130	232.062	18.84	5.3	5-Aminoxanthotoxin	[M+H]+	0.9792	Cid_344253	Phenylpropanoids_and_polyketides	Coumarins_and_derivatives	Furanocoumarins	6.14584e+06	7.93333e+06	7.03123e+06	7.28766e+06	6.60028e+06	0.0970056	6.99967e+06
	M233T857	233.154	14.28	0.6	4-Methoxy PV9	[M+H-C4H9N]+	0.9696	Cid_102144585	Organic_oxygen_compounds	Organooxygen_compounds	Carbonyl_compounds	5.6744e+08	5.89553e+08	5.68742e+08	5.64042e+08	5.29437e+08	0.0384672	5.63843e+08
	M233T797	233.154	13.29	1	((1S,5Z,9R,10R)-6-(Hydroxymethyl)-10-methyl-2-methylidene-7-oxobicyclo[7.2.0]undec-5-en-10-yl)methyl acetate	[M+H-C2H4O2]+	0.9306	Cid_15601259	Lipids_and_lipid_like_molecules	Prenol_lipids	Sesquiterpenoids	1.35568e+08	1.28781e+08	1.38953e+08	1.30168e+08	1.40394e+08	0.0383426	1.34773e+08
	M233T702	233.154	11.7	0.6	Berkedrimane A	[M+H-C7H13NO3]+	0.7556	Cid_75368727	Organoheterocyclic_compounds	Naphthofurans	unknown	5.07668e+07	5.20463e+07	4.95982e+07	5.60995e+07	5.07103e+07	0.0488344	5.18442e+07
	M233T431	233.19	7.18	0.5	Sclareolide	[M+H-H2O]+	0.9141	Cid_929262	Organoheterocyclic_compounds	Naphthofurans	unknown	7.40812e+07	7.72577e+07	8.27623e+07	7.37323e+07	7.4865e+07	0.0488709	7.65397e+07
	M235T52	235.119	0.87	0.9	His-Pro	[M+H-H2O]+	0.9913	Cid_152322	Organic_acids_and_derivatives	Carboxylic_acids_and_derivatives	Amino_acids__peptides__and_analogues	3.14188e+07	3.2719e+07	3.31295e+07	3.28533e+07	3.60751e+07	0.0516467	3.32391e+07
	M235T827	235.17	13.78	1	ONO-8711	[M+H-C7H8ClNO2S]+	0.747	Cid_9824507	Benzenoids	Benzene_and_substituted_derivatives	Benzenesulfonamides	5.96624e+07	5.92273e+07	5.54961e+07	5.69159e+07	5.4637e+07	0.0388313	5.71877e+07
	M237T821_1	237.221	13.68	0.7	Ethyl palmitoleate	[M+H-C2H6O]+	0.9362	Cid_6436624	Lipids_and_lipid_like_molecules	Fatty_Acyls	Fatty_acid_esters	8.82304e+08	8.67768e+08	5.64398e+08	8.15276e+08	6.39931e+08	0.190047	7.53935e+08
	M239T367	239.07	6.12	0	6,2'-Dihydroxyflavanone	[M+H-H2O]+	0.9988	Cid_5106787	Phenylpropanoids_and_polyketides	Flavonoids	Flavans	1.83013e+07	1.93445e+07	1.87872e+07	1.84e+07	1.9346e+07	0.0265057	1.88358e+07
	M241T767	241.086	12.79	0.9	(E)-1,3-Bis(3-hydroxyphenyl)prop-2-en-1-one	[M+H]+	0.8276	Cid_9448219	Phenylpropanoids_and_polyketides	Linear_1_3_diarylpropanoids	Chalcones_and_dihydrochalcones	3.79838e+07	3.78309e+07	3.73538e+07	3.63589e+07	3.74819e+07	0.0170104	3.74019e+07
	M241T773	241.18	12.88	1	Tetradecanedioic acid	[M+H-H2O]+	0.8695	Cid_13185	Lipids_and_lipid_like_molecules	Fatty_Acyls	Fatty_acids_and_conjugates	8.93797e+07	8.65557e+07	8.99216e+07	9.80918e+07	7.92985e+07	0.0763269	8.86495e+07
	M243T267	243.134	4.46	0.7	2-Piperazinepropionic acid, 5-isobutyl-3,6-dioxo-	[M+H]+	0.9685	Cid_86178349	Organic_acids_and_derivatives	Carboximidic_acids_and_derivatives	Carboximidic_acids	3.28171e+07	3.14548e+07	3.19532e+07	3.12593e+07	3.19544e+07	0.018912	3.18878e+07
	M244T216_3	244.129	3.61	15.6	Ethyl 3-(1-benzyloxycarbonylpiperidin-4-yl)-3-oxopropanoate	[M+H-C3H6O3]+	0.7674	Cid_10449485	Benzenoids	Benzene_and_substituted_derivatives	Benzyloxycarbonyls	2.28518e+07	2.18909e+07	2.14878e+07	2.16281e+07	2.00415e+07	0.0468684	2.158e+07
	M245T291	245.117	4.85	0.8	7-Oxabicyclo[4.1.0]hept-3-en-2-one, 5-hydroxy-3-(hydroxymethyl)-1-(1-hydroxy-3-methyl-2-buten-1-yl)-4-(1-propen-1-yl)-	[M+H-2H2O]+	0.8861	Cid_45359217	Organic_oxygen_compounds	Organooxygen_compounds	Carbonyl_compounds	5.28904e+07	5.29677e+07	5.25118e+07	5.32509e+07	5.66786e+07	0.0318306	5.36599e+07
	M245T304	245.129	5.06	0.1	Proline, cyclic dipeptide with phenylalanine	[M+H]+	0.9828	Cid_99895	Organic_acids_and_derivatives	Carboxylic_acids_and_derivatives	Amino_acids__peptides__and_analogues	1.50574e+07	1.52473e+07	1.52415e+07	1.619e+07	1.58637e+07	0.0311183	1.552e+07
	M245T324	245.129	5.39	0.5	Phe-Pro	[M+H-H2O]+	0.9372	Cid_7020642	Organic_acids_and_derivatives	Carboxylic_acids_and_derivatives	Amino_acids__peptides__and_analogues	1.6809e+07	1.66685e+07	1.74994e+07	1.6841e+07	1.75002e+07	0.0236428	1.70636e+07
	M245T337	245.138	5.61	0.1	9-Glyceryloxy-9-ketopelargonic acid	[M+H-H2O]+	0.803	Cid_45783154	Lipids_and_lipid_like_molecules	Fatty_Acyls	Fatty_acids_and_conjugates	3.08995e+07	3.18312e+07	3.06763e+07	3.1134e+07	3.02145e+07	0.0193089	3.09511e+07
	M247T1129_1	247.167	18.82	9.4	Oxacyclohexadeca-3,11,13-trien-2-one, 6-hydroxy-16-methyl-	[M-H2O+H]+	0.9857	Cid_75528938	Phenylpropanoids_and_polyketides	Macrolides_and_analogues	unknown	6.24062e+06	6.43851e+06	6.99672e+06	5.215e+06	5.19355e+06	0.131623	6.01688e+06
	M249T380	249.112	6.34	0.8	7,8-Dihydrokawain-5-ol	[M+H]+	0.9474	Cid_10944777	Phenylpropanoids_and_polyketides	Kavalactones	unknown	5.25059e+07	5.20196e+07	4.89752e+07	5.048e+07	4.53594e+07	0.057674	4.9868e+07
	M249T663	249.149	11.04	2.2	Parthenolide	[M+H]+	0.8048	Cid_7251185	Lipids_and_lipid_like_molecules	Prenol_lipids	Terpene_lactones	4.77913e+07	4.62743e+07	4.4465e+07	4.5894e+07	4.43412e+07	0.0310993	4.57532e+07
	M249T546	249.149	9.09	1.1	Cumanin	[M+H-H2O]+	0.9435	Cid_23844091	Lipids_and_lipid_like_molecules	Prenol_lipids	Terpene_lactones	3.1561e+07	3.33044e+07	3.16095e+07	3.24487e+07	3.11873e+07	0.0266171	3.20222e+07
	M249T564	249.185	9.39	0.6	I-SAP	[M+H-C6H6INO2S]+	0.8935	Cid_5312147	Lipids_and_lipid_like_molecules	Prenol_lipids	Monoterpenoids	4.77827e+07	3.95116e+07	4.00224e+07	3.89811e+07	3.53536e+07	0.112874	4.03303e+07
	M250T624	250.178	10.4	9.5	Alprenolol	[M+H]+	0.9815	Cid_2119	Benzenoids	Phenol_ethers	unknown	4.12103e+07	4.41702e+07	4.04618e+07	4.50143e+07	4.03428e+07	0.051927	4.22399e+07
	M251T431	251.201	7.18	0.4	Aleuritic acid	[M+H-3H2O]+	0.9355	Cid_222178	Lipids_and_lipid_like_molecules	Fatty_Acyls	Fatty_acids_and_conjugates	6.17628e+08	5.95312e+08	6.45999e+08	5.5631e+08	5.7525e+08	0.0588282	5.981e+08
	M252T495	252.078	8.25	0	2-(3,4,5-Trimethoxyphenyl)chromone	[M+H-C2H5O2]+	0.9837	Cid_332208	Phenylpropanoids_and_polyketides	Flavonoids	O_methylated_flavonoids	1.52881e+08	1.63862e+08	1.61692e+08	1.59152e+08	1.49242e+08	0.038941	1.57366e+08
	M253T740	253.086	12.34	0.7	Karinjin	[M+H]+	0.9938	Cid_146013	Phenylpropanoids_and_polyketides	Flavonoids	O_methylated_flavonoids	1.60708e+08	1.65607e+08	1.85883e+08	1.75383e+08	1.57723e+08	0.0682931	1.69061e+08
	M253T841	253.216	14.02	0.8	15-Hexadecynoic acid	[M+H]+	0.7485	Cid_127256	Lipids_and_lipid_like_molecules	Fatty_Acyls	Fatty_acids_and_conjugates	1.52972e+08	2.10731e+08	1.7389e+08	1.87189e+08	1.93402e+08	0.117976	1.83637e+08
	M255T666	255.065	11.1	0.2	5,6-Dihydroxyflavone	[M+H]+	0.9924	Cid_14349487	Phenylpropanoids_and_polyketides	Flavonoids	Flavones	3.99895e+07	4.29275e+07	3.92687e+07	4.00451e+07	4.01101e+07	0.0349972	4.04682e+07
	M255T772	255.102	12.87	0.6	2',6'-Dihydroxy 4'-methoxydihydrochalcone	[M+H-H2O]+	0.9444	Cid_169676	Phenylpropanoids_and_polyketides	Linear_1_3_diarylpropanoids	Chalcones_and_dihydrochalcones	9.47551e+07	9.57208e+07	9.62438e+07	9.91242e+07	9.02713e+07	0.0337229	9.5223e+07
	M256T74	256.093	1.23	15.5	Dehydronifedipine	[M+H-C2H3NO3]+	0.8886	Cid_128753	Organoheterocyclic_compounds	Pyridines_and_derivatives	Phenylpyridines	3.07985e+07	3.09672e+07	3.49581e+07	3.70455e+07	3.74549e+07	0.0938057	3.42448e+07
	M256T942	256.264	15.69	0.4	Palmitoyl ceramide	[M+H-C18H34O2]+	0.9689	Cid_5283564	Lipids_and_lipid_like_molecules	Sphingolipids	Ceramides	1.60545e+07	1.59305e+07	1.12249e+07	1.34507e+07	1.39019e+07	0.141263	1.41125e+07
	M257T306	257.081	5.11	0.8	Liquiritigenin	[M+H]+	0.7073	Cid_114829	Phenylpropanoids_and_polyketides	Flavonoids	Flavans	1.22216e+07	1.17885e+07	1.2302e+07	1.41076e+07	1.83061e+07	0.196451	1.37452e+07
	M257T696	257.117	11.6	0.7	Tetranor-PGDM lactone	[M+H-3H2O]+	0.8084	Cid_68011454	Organic_acids_and_derivatives	Keto_acids_and_derivatives	Medium_chain_keto_acids_and_derivatives	2.61515e+08	3.34903e+08	2.71231e+08	3.65835e+08	2.62366e+08	0.160949	2.9917e+08
	M258T45	258.11	0.74	3.4	sn-Glycero-3-phosphocholine	[M]+	0.9778	Cid_439285	Lipids_and_lipid_like_molecules	Glycerophospholipids	Glycerophosphocholines	6.06141e+07	6.09727e+07	6.27024e+07	6.14327e+07	6.5137e+07	0.0295323	6.21718e+07
	M259T69	259.093	1.14	0.8	D-Pyroglutamic acid	[2M+H]+	0.921	Cid_439685	Organic_acids_and_derivatives	Carboxylic_acids_and_derivatives	Amino_acids__peptides__and_analogues	2.36397e+07	2.29511e+07	2.2789e+07	2.18516e+07	2.3113e+07	0.0285214	2.28689e+07
	M261T233	261.112	3.88	0.8	Urospermal	[M+H-H2O]+	0.8358	Cid_14287067	Lipids_and_lipid_like_molecules	Prenol_lipids	Terpene_lactones	9.99137e+06	9.0633e+06	9.04512e+06	9.46681e+06	9.69057e+06	0.0431302	9.45143e+06
	M261T52	261.156	0.87	13.6	MN-25	[M+H-C11H17NO]+	0.8545	Cid_71308243	Organoheterocyclic_compounds	Indoles_and_derivatives	Indolecarboxylic_acids_and_derivatives	6.24303e+07	6.82095e+07	6.70469e+07	6.31786e+07	6.9026e+07	0.045365	6.59783e+07
	M263T750	263.164	12.5	0.6	Brefeldin A	[M+H-H2O]+	0.9745	Cid_5352004	Phenylpropanoids_and_polyketides	Macrolides_and_analogues	unknown	1.44029e+08	1.39914e+08	1.49548e+08	1.43512e+08	1.37639e+08	0.0317627	1.42928e+08
	M266T42	266.16	0.7	19.6	1-Methyl-4-(1-methylpyrrolidin-2-yl)-9H-b-carboline	[M+H]+	0.9157	Cid_5748597	Alkaloids_and_derivatives	Harmala_alkaloids	unknown	1.54948e+07	1.47069e+07	1.78069e+07	1.64632e+07	1.91657e+07	0.106865	1.67275e+07
	M268T69	268.104	1.15	0.8	Adenosine	[M+H]+	0.9997	Cid_447270	Nucleosides__nucleotides__and_analogues	Purine_nucleosides	unknown	1.15277e+08	1.15376e+08	1.63454e+08	1.15843e+08	1.36084e+08	0.163453	1.29207e+08
	M269T499	269.081	8.32	0.4	Isopratol	[M+H]+	0.9131	Cid_676307	Phenylpropanoids_and_polyketides	Flavonoids	O_methylated_flavonoids	4.18985e+08	4.12909e+08	4.61937e+08	4.3732e+08	4.06634e+08	0.0523398	4.27557e+08
	M269T345	269.081	5.74	0.8	6-Hydroxy-5-methoxyflavone	[M+H]+	0.9953	Cid_14349485	Phenylpropanoids_and_polyketides	Flavonoids	O_methylated_flavonoids	4.26156e+07	4.23195e+07	4.04751e+07	4.19012e+07	4.24643e+07	0.0207162	4.19551e+07
	M269T390	269.081	6.5	1.8	Formononetin	[M+H]+	0.9957	Cid_5280378	Phenylpropanoids_and_polyketides	Isoflavonoids	O_methylated_isoflavonoids	3.00155e+07	2.35899e+07	2.13348e+07	2.45441e+07	2.11113e+07	0.149529	2.41191e+07
	M269T730	269.081	12.17	24.8	2-Benzylthio-4(3H)-quinazolinone	[M+H]+	0.8958	Cid_135408573	Organoheterocyclic_compounds	Diazanaphthalenes	Benzodiazines	2.88234e+07	3.32136e+07	3.1711e+07	3.25308e+07	2.76824e+07	0.0783419	3.07922e+07
	M269T791_2	269.117	13.19	0.6	3,4-Dimethoxychalcone	[M+H]+	0.9289	Cid_5354494	Phenylpropanoids_and_polyketides	Linear_1_3_diarylpropanoids	Chalcones_and_dihydrochalcones	1.00248e+09	1.00935e+09	9.61511e+08	9.48012e+08	9.32072e+08	0.0349187	9.70686e+08
	M269T754	269.117	12.57	9.3	Zederone	[M+Na]+	0.8782	Cid_71694446	Lipids_and_lipid_like_molecules	Prenol_lipids	Sesquiterpenoids	9.70296e+07	9.88231e+07	1.00768e+08	9.5364e+07	9.54737e+07	0.0236806	9.74917e+07
	M270T757	270.125	12.62	8.3	1,2-Diphenylindole	[M+H]+	0.7633	Cid_87638	Organoheterocyclic_compounds	Indoles_and_derivatives	Indoles	1.014e+08	1.1166e+08	1.53546e+08	1.3148e+08	1.58504e+08	0.190939	1.31318e+08
	M271T587_4	271.097	9.78	24.6	1-Benzoyl-3-p-tolylthiourea	[M+H]+	0.918	Cid_2787704	Benzenoids	Benzene_and_substituted_derivatives	N_phenylthioureas	1.7943e+09	1.76439e+09	1.86182e+09	2.01267e+09	1.85053e+09	0.0516617	1.85674e+09
	M271T729	271.097	12.15	0.7	Pinostrobin	[M+H]+	0.9898	Cid_73201	Phenylpropanoids_and_polyketides	Flavonoids	O_methylated_flavonoids	2.23327e+08	2.32796e+08	2.28605e+08	2.26489e+08	2.03503e+08	0.0511312	2.22944e+08
	M271T532_2	271.097	8.87	0.7	Cardamonin	[M+H]+	0.9958	Cid_641785	Phenylpropanoids_and_polyketides	Linear_1_3_diarylpropanoids	Chalcones_and_dihydrochalcones	4.54113e+08	4.46033e+08	4.51893e+08	4.45823e+08	4.50495e+08	0.00812444	4.49672e+08
	M273T620	273.146	10.33	0.9	7-Hydroxy-9-(hydroxymethyl)-1,4,9-trimethyl-2,4,5,7,8,8a-hexahydro-4,7-methanoazulen-6(1H)-one	[M+Na]+	0.9597	Cid_57509414	Organic_oxygen_compounds	Organooxygen_compounds	Alcohols_and_polyols	3.7591e+07	3.52591e+07	3.44224e+07	3.84246e+07	3.59153e+07	0.0455203	3.63225e+07
	M275T265	275.092	4.42	1	Symposide	[M+H-C6H10O5]+	0.9883	Cid_75528886	Phenylpropanoids_and_polyketides	Flavonoids	Flavonoid_glycosides	3.84844e+07	3.63867e+07	3.79168e+07	3.79075e+07	3.91227e+07	0.0266904	3.79636e+07
	M279T863	279.159	14.39	1.2	Butyl terephthalate	[M+H]+	0.9987	Cid_16066	Benzenoids	Benzene_and_substituted_derivatives	Benzoic_acids_and_derivatives	2.86161e+08	2.7523e+08	2.70146e+08	2.75659e+08	1.76739e+08	0.175731	2.56787e+08
	M281T383	281.115	6.38	8.1	TC 80	[M+H]+	0.9988	Cid_3747	Phenylpropanoids_and_polyketides	Isoflavonoids	Isoflav_2_enes	5.20636e+07	5.01595e+07	4.67142e+07	5.45123e+07	4.42867e+07	0.0826371	4.95473e+07
	M281T783	281.248	13.04	1.3	Oleic acid epoxide	[M+H-H2O]+	0.9266	Cid_15868	Lipids_and_lipid_like_molecules	Fatty_Acyls	Lineolic_acids_and_derivatives	5.41661e+07	5.76641e+07	5.58308e+07	5.19776e+07	5.11495e+07	0.0496286	5.41576e+07
	M282T896	282.279	14.94	1	Oleamide	[M+H]+	0.867	Cid_5283387	Lipids_and_lipid_like_molecules	Fatty_Acyls	Fatty_amides	3.77287e+07	3.58157e+07	3.25259e+07	2.97993e+07	3.41104e+07	0.0895007	3.3996e+07
	M283T593_2	283.097	9.88	0.8	3,7-Dimethoxyflavone	[M+H]+	0.9948	Cid_688664	Phenylpropanoids_and_polyketides	Flavonoids	O_methylated_flavonoids	1.70544e+09	1.66207e+09	1.65653e+09	1.70667e+09	1.68721e+09	0.013988	1.68358e+09
	M283T385	283.097	6.41	0.8	5,7-Di-O-methylapigeninidin	[Cat]+	0.9963	Cid_10018816	Phenylpropanoids_and_polyketides	Flavonoids	O_methylated_flavonoids	1.76559e+08	1.74092e+08	1.73029e+08	1.82269e+08	1.5709e+08	0.0543584	1.72608e+08
	M283T619	283.097	10.32	1	3-(3,4-Dimethoxyphenyl)coumarin	[M+H]+	0.9134	Cid_388101	Phenylpropanoids_and_polyketides	Isoflavonoids	Isoflav_3_enes	1.9398e+08	2.05256e+08	1.92601e+08	2.14311e+08	2.3509e+08	0.0836758	2.08248e+08
	M283T720	283.097	12	0.9	4,2'-Dihydroxy-4',6'-dimethoxychalcone	[M+H-H2O]+	0.9805	Cid_6293081	Phenylpropanoids_and_polyketides	Linear_1_3_diarylpropanoids	Chalcones_and_dihydrochalcones	5.37545e+08	5.1448e+08	5.19145e+08	5.24914e+08	5.39672e+08	0.021091	5.27151e+08
	M284T73	284.099	1.22	1.3	Guanosine	[M+H]+	0.9992	Cid_135398635	Nucleosides__nucleotides__and_analogues	Purine_nucleosides	unknown	4.16128e+07	4.56848e+07	4.42294e+07	4.44662e+07	5.01764e+07	0.0693323	4.52339e+07
	M285T447	285.076	7.45	0.8	Calycosin	[M+H]+	0.9958	Cid_5280448	Phenylpropanoids_and_polyketides	Isoflavonoids	O_methylated_isoflavonoids	1.92764e+08	1.94816e+08	1.98656e+08	1.84708e+08	1.84954e+08	0.0322723	1.91179e+08
	M287T495	287.055	8.25	3	Citreorosein	[M+H]+	0.988	Cid_361512	Benzenoids	Anthracenes	Anthraquinones	6.75845e+07	6.24774e+07	6.76519e+07	5.92544e+07	5.95458e+07	0.0653407	6.33028e+07
	M287T657	287.055	10.95	0.2	Cyanin cation	[Cat-C12H20O10]+	0.9744	Cid_441688	Phenylpropanoids_and_polyketides	Flavonoids	Flavonoid_glycosides	1.45687e+08	1.51638e+08	1.31344e+08	1.30621e+08	1.27504e+08	0.0773857	1.37359e+08
	M289T47	289.092	0.78	0.4	Palatinose	[M+H-3H2O]+	0.9053	Cid_83686	Lipids_and_lipid_like_molecules	Fatty_Acyls	Fatty_acyl_glycosides	3.2942e+07	3.43263e+07	3.55579e+07	3.50069e+07	3.57896e+07	0.0329754	3.47245e+07
	M289T68	289.14	1.13	4.6	1,9b-Dihydroxy-6,6,9a-trimethyl-1,5,5a,7,8,9-hexahydrobenz[e]isobenzofuran-3-one	[M+Na]+	0.9595	Cid_45783128	Organoheterocyclic_compounds	Naphthofurans	unknown	8.18459e+07	7.72071e+07	7.92586e+07	9.05423e+07	9.15766e+07	0.0783094	8.40861e+07
	M293T638	293.079	10.63	7.5	Karanjin	[M+H]+	0.7091	Cid_100633	Phenylpropanoids_and_polyketides	Flavonoids	Flavones	2.86404e+08	3.01144e+08	2.69351e+08	2.96323e+08	2.82098e+08	0.0434692	2.87064e+08
	M294T79	294.155	1.32	2.8	N-fructosyl isoleucine	[M+H]+	0.9596	Cid_139292115	Organic_acids_and_derivatives	Carboxylic_acids_and_derivatives	Amino_acids__peptides__and_analogues	2.69772e+07	2.68726e+07	2.90635e+07	2.98997e+07	2.89333e+07	0.0477123	2.83493e+07
	M295T324	295.06	5.4	4.1	4-(3,4-Dihydroxyphenyl)-6,7-dihydroxy-2-naphthoic acid	[M-H2O+H]+	0.9101	Cid_195328	Benzenoids	Naphthalenes	Naphthalenecarboxylic_acids_and_derivatives	1.08246e+07	9.62371e+06	1.04945e+07	9.27052e+06	8.96022e+06	0.0810695	9.83471e+06
	M295T523	295.094	8.71	14.2	Boc-Gly-OSu	[M+Na]+	0.9932	Cid_76926	Organic_acids_and_derivatives	Carboxylic_acids_and_derivatives	Amino_acids__peptides__and_analogues	2.24091e+07	2.36173e+07	2.29027e+07	1.97249e+07	2.0884e+07	0.0720901	2.19076e+07
	M295T840	295.227	14	0	9-Oxo-ODE	[M+H]+	0.8342	Cid_9839084	Lipids_and_lipid_like_molecules	Fatty_Acyls	Lineolic_acids_and_derivatives	5.33949e+07	5.39202e+07	5.21945e+07	5.15118e+07	5.26801e+07	0.0180661	5.27403e+07
	M295T553	295.227	9.22	0.6	9-Octadecenoic acid, 5,8,11-trihydroxy-	[M+H-2H2O]+	0.8743	Cid_24096399	Lipids_and_lipid_like_molecules	Fatty_Acyls	Fatty_acids_and_conjugates	2.45226e+07	2.48734e+07	2.66833e+07	2.65068e+07	2.55844e+07	0.0374124	2.56341e+07
	M297T563	297.11	9.38	7.8	2-Hydroxy-2',4',6'-trimethoxychalcone	[M+H-H2O]+	0.9973	Cid_5883711	Phenylpropanoids_and_polyketides	Linear_1_3_diarylpropanoids	Cinnamylphenols	2.23424e+07	2.04641e+07	2.4175e+07	2.19247e+07	1.99701e+07	0.0764338	2.17753e+07
	M297T773	297.243	12.88	0.9	Oxiraneoctanoic acid, .eta.-hydroxy-3-octyl-	[M+H-H2O]+	0.8069	Cid_53851542	Lipids_and_lipid_like_molecules	Fatty_Acyls	Lineolic_acids_and_derivatives	4.05302e+07	4.87078e+07	4.31592e+07	4.37596e+07	4.08644e+07	0.0755607	4.34042e+07
	M299T684	299.092	11.39	0.4	5,7-Dimethoxyluteolinidin cation	[Cat]+	0.9772	Cid_102124988	Phenylpropanoids_and_polyketides	Flavonoids	O_methylated_flavonoids	5.78947e+07	6.2197e+07	6.36657e+07	6.21117e+07	6.42957e+07	0.0402564	6.20329e+07
	M300T342	300.123	5.7	0.2	N-Benzoyl-3-phenylisoserine methyl ester	[M+H]+	0.8786	Cid_10990203	Benzenoids	Benzene_and_substituted_derivatives	Benzoic_acids_and_derivatives	1.78456e+07	1.66544e+07	1.6896e+07	1.796e+07	1.77514e+07	0.0344796	1.74215e+07
	M302T52	302.135	0.86	20.1	2-Amino-6-(4-methoxyphenyl)-4-phenylnicotinonitrile	[M+H]+	0.978	Cid_915425	Organoheterocyclic_compounds	Pyridines_and_derivatives	Phenylpyridines	1.16453e+07	1.32682e+07	1.49108e+07	1.50056e+07	1.46138e+07	0.103313	1.38888e+07
	M302T742	302.305	12.37	0.3	Sphinganine (d18:0)	[M+H]+	0.9848	Cid_91486	Organic_nitrogen_compounds	Organonitrogen_compounds	Amines	5.55132e+07	4.40583e+07	4.88508e+07	4.84476e+07	4.81684e+07	0.0840461	4.90076e+07
	M303T478	303.123	7.96	0.3	Isomucronulatol	[M+H]+	0.9043	Cid_10380176	Phenylpropanoids_and_polyketides	Isoflavonoids	O_methylated_isoflavonoids	2.208e+08	2.20562e+08	2.15704e+08	2.33611e+08	2.23748e+08	0.0298532	2.22885e+08
	M305T720	305.079	12	7.5	3',4'-Dihydroxy-.beta.-naphthoflavone	[M+H]+	0.993	Cid_676032	Phenylpropanoids_and_polyketides	Flavonoids	Flavones	3.85968e+07	3.3371e+07	3.72847e+07	3.52939e+07	3.76861e+07	0.0576357	3.64465e+07
	M305T51	305.135	0.84	4.8	Lactarolide A	[M+Na]+	0.9419	Cid_156145	Lipids_and_lipid_like_molecules	Prenol_lipids	Terpene_lactones	3.07684e+07	3.37366e+07	3.12609e+07	3.35699e+07	3.32628e+07	0.0429071	3.25197e+07
	M310T486	310.217	8.11	0.6	Benproperine	[M+H]+	0.9829	Cid_2326	Benzenoids	Benzene_and_substituted_derivatives	Diphenylmethanes	2.16893e+08	1.86547e+08	1.98294e+08	2.03727e+08	1.86652e+08	0.0641892	1.98422e+08
	M313T935	313.216	15.59	0.5	Reichstein's substance V	[M+H-3H2O]+	0.9424	Cid_12444612	Lipids_and_lipid_like_molecules	Steroids_and_steroid_derivatives	Hydroxysteroids	4.32319e+07	4.63657e+07	6.23735e+07	4.66527e+07	4.92451e+07	0.150611	4.95738e+07
	M315T463	315.086	7.72	0	Odoratin	[M+H]+	0.9924	Cid_13965473	Phenylpropanoids_and_polyketides	Isoflavonoids	O_methylated_isoflavonoids	1.9312e+07	2.01668e+07	1.98176e+07	1.85939e+07	1.86442e+07	0.0361435	1.93069e+07
	M317T642	317.138	10.7	6.1	Epiafzelechin trimethyl ether	[M+H]+	0.9348	Cid_6708630	Phenylpropanoids_and_polyketides	Flavonoids	O_methylated_flavonoids	1.27869e+08	1.3091e+08	1.28334e+08	1.21461e+08	1.23947e+08	0.029732	1.26504e+08
	M320T84	320.172	1.41	22.8	Venalstonine	[M+H-NH3]+	0.7695	Cid_821468	Alkaloids_and_derivatives	Aspidofractine_alkaloids	unknown	1.10966e+07	1.0708e+07	1.06597e+07	1.27815e+07	1.17934e+07	0.0781844	1.14078e+07
	M322T662	322.217	11.03	0.4	Lobelanidine	[M+H-H2O]+	0.8984	Cid_96946	Organic_nitrogen_compounds	Organonitrogen_compounds	Amines	3.70825e+08	3.64283e+08	3.59348e+08	3.82716e+08	3.45619e+08	0.037683	3.64558e+08
	M325T925	325.216	15.41	0.3	Etonogestrel	[M+H]+	0.9806	Cid_6917715	Lipids_and_lipid_like_molecules	Steroids_and_steroid_derivatives	Estrane_steroids	6.26114e+07	6.45736e+07	6.3481e+07	6.60137e+07	4.9362e+07	0.110168	6.12084e+07
	M328T424_1	328.227	7.07	0.5	Butorphanol	[M+H]+	0.9399	Cid_5361092	Benzenoids	Phenanthrenes_and_derivatives	unknown	5.90816e+08	5.94524e+08	5.84433e+08	5.4988e+08	5.75948e+08	0.0307363	5.7912e+08
	M329T709	329.102	11.81	0.2	3',4',5'-Trimethoxyflavonol	[M+H]+	0.9705	Cid_688827	Phenylpropanoids_and_polyketides	Flavonoids	Flavones	5.30931e+07	5.53883e+07	4.92755e+07	5.24454e+07	5.05127e+07	0.0453897	5.2143e+07
	M329T672	329.138	11.2	7	Yuehgesin C	[M+Na]+	0.7714	Cid_5319451	Phenylpropanoids_and_polyketides	Coumarins_and_derivatives	unknown	7.20259e+07	7.29323e+07	7.03206e+07	7.41986e+07	6.87225e+07	0.030115	7.164e+07
	M331T400	331.154	6.67	0.7	TETRAHYDROSAPPANONE A TRIMETHYL ETHER	[M+H]+	0.8038	Cid_6708784	Phenylpropanoids_and_polyketides	Homoisoflavonoids	Homoisoflavans	1.51697e+07	1.5532e+07	1.49079e+07	1.58115e+07	1.58489e+07	0.026463	1.5454e+07
	M333T444	333.133	7.4	3.1	Duartin (-)	[M+H]+	0.7085	Cid_6710727	Phenylpropanoids_and_polyketides	Isoflavonoids	O_methylated_isoflavonoids	5.32e+07	5.39812e+07	5.56933e+07	5.28536e+07	5.03216e+07	0.0366732	5.32099e+07
	M334T535	334.128	8.92	7	Propiophenone, 3-[(o-aminophenyl)thio]-3-phenyl-	[M+H]+	0.8572	Cid_308243	Phenylpropanoids_and_polyketides	Linear_1_3_diarylpropanoids	Chalcones_and_dihydrochalcones	5.478e+07	4.83556e+07	4.90458e+07	4.77475e+07	4.76099e+07	0.0606282	4.95078e+07
	M337T742	337.141	12.37	6.7	Pongachin	[M+H]+	0.9874	Cid_6923887	Phenylpropanoids_and_polyketides	Flavonoids	Pyranoflavonoids	2.7328e+08	2.59003e+08	2.68486e+08	2.51529e+08	2.50862e+08	0.0384952	2.60632e+08
	M338T1128	338.342	18.81	0.7	Erucamide	[M+H]+	0.9207	Cid_5365371	Lipids_and_lipid_like_molecules	Fatty_Acyls	Fatty_amides	6.64405e+07	8.16181e+07	5.61216e+07	5.43145e+07	5.54184e+07	0.184803	6.27826e+07
	M341T515	341.136	8.59	6.8	Sophoraflavanone B	[M+H]+	0.9956	Cid_480764	Phenylpropanoids_and_polyketides	Flavonoids	Flavans	4.92505e+07	5.34535e+07	5.29118e+07	4.70267e+07	4.9569e+07	0.0533929	5.04423e+07
	M343T393	343.115	6.56	6.5	3,6,3',4'-Tetramethoxyflavone	[M+H]+	0.9997	Cid_688812	Phenylpropanoids_and_polyketides	Flavonoids	O_methylated_flavonoids	2.3679e+07	2.38813e+07	2.29972e+07	2.23591e+07	2.32368e+07	0.025814	2.32307e+07
	M343T878	343.227	14.64	1.2	10(S),17(S)-DiHDoHE	[M+H-H2O]+	0.9458	Cid_11667655	Lipids_and_lipid_like_molecules	Fatty_Acyls	Fatty_acids_and_conjugates	1.3677e+08	1.78627e+08	1.20085e+08	1.31937e+08	1.12361e+08	0.189187	1.35956e+08
	M351T586	351.253	9.77	7.3	Avocadene 4-acetate	[M+Na]+	0.8439	Cid_45360076	Lipids_and_lipid_like_molecules	Fatty_Acyls	Fatty_alcohols	4.15532e+07	4.11172e+07	3.99365e+07	4.43465e+07	4.46176e+07	0.0488654	4.23142e+07
	M353T553	353.23	9.22	2.8	15-Octadecenoic acid, 9,12,13-trihydroxy-	[M+Na]+	0.999	Cid_24066906	Lipids_and_lipid_like_molecules	Fatty_Acyls	Fatty_acids_and_conjugates	3.56839e+07	3.77428e+07	3.38109e+07	3.86139e+07	3.6038e+07	0.0515174	3.63779e+07
	M353T780	353.269	13	0.5	1-Monolinolenin	[M+H]+	0.9026	Cid_5367328	Lipids_and_lipid_like_molecules	Fatty_Acyls	Lineolic_acids_and_derivatives	3.43906e+07	3.76806e+07	3.48592e+07	3.53137e+07	4.42401e+07	0.109468	3.72969e+07
	M355T443	355.115	7.38	6.1	3,4-Dipiperonyltetrahydrofuran-2-one	[M+H]+	0.9986	Cid_327062	Lignans__neolignans_and_related_compounds	Furanoid_lignans	Tetrahydrofuran_lignans	7.62929e+07	7.72609e+07	8.03632e+07	7.66278e+07	8.9069e+07	0.0670789	7.99227e+07
	M355T819	355.227	13.66	0.6	Glucopyranoside, xysmalogenin-3, .beta.-D-	[M+H-C6H12O6]+	0.9213	Cid_45360026	Lipids_and_lipid_like_molecules	Steroids_and_steroid_derivatives	Steroidal_glycosides	5.23066e+07	5.52538e+07	5.83483e+07	6.5734e+07	5.2826e+07	0.0964889	5.68937e+07
	M356T347	356.222	5.78	1	Equisetin	[M+H-H2O]+	0.7924	Cid_54684703	Organoheterocyclic_compounds	Pyrrolidines	N_alkylpyrrolidines	1.78247e+07	1.77487e+07	1.71022e+07	1.77776e+07	1.93515e+07	0.0463182	1.79609e+07
	M358T336	358.238	5.6	0.8	11-Ethyl-7,16-dihydroxy-13-methyl-6-methylidene-11-azahexacyclo[7.7.2.15,8.01,10.02,8.013,17]nonadecan-4-one	[M+H]+	0.7298	Cid_120706	Lipids_and_lipid_like_molecules	Prenol_lipids	Diterpenoids	9.74853e+07	9.85511e+07	9.46531e+07	9.59905e+07	9.73844e+07	0.0156149	9.68129e+07
	M358T400	358.238	6.67	0.3	Songorine	[M+H]+	0.9695	Cid_71456946	Lipids_and_lipid_like_molecules	Prenol_lipids	Diterpenoids	3.3278e+08	3.81174e+08	3.24142e+08	3.31438e+08	3.64922e+08	0.0714295	3.46891e+08
	M359T431	359.152	7.18	8.3	(9-Hydroxy-5,8-dimethyl-1-methylidene-2,6-dioxo-4,8a,9,9a-tetrahydro-3aH-azuleno[6,7-b]furan-4-yl) 3-methylbut-2-enoate	[M+H]+	0.9411	Cid_45359776	Lipids_and_lipid_like_molecules	Prenol_lipids	Terpene_lactones	4.03718e+07	3.57038e+07	3.92963e+07	3.55717e+07	3.68939e+07	0.0576514	3.75675e+07
	M360T47	360.15	0.78	0.2	Leucrose	[M+NH4]+	0.9724	Cid_165577	Lipids_and_lipid_like_molecules	Fatty_Acyls	Fatty_acyl_glycosides	1.27348e+08	8.63632e+07	8.32194e+07	1.02016e+08	9.38539e+07	0.179141	9.85602e+07
	M365T55	365.106	0.92	1.3	Sucrose	[M+Na]+	0.9982	Cid_5988	Organic_oxygen_compounds	Organooxygen_compounds	Carbohydrates_and_carbohydrate_conjugates	2.26587e+08	2.7128e+08	2.62733e+08	2.43289e+08	2.95693e+08	0.101871	2.59917e+08
	M365T878	365.209	14.63	5.1	CD 3254	[M+H]+	0.8279	Cid_44566110	Benzenoids	Naphthalenes	Phenylnaphthalenes	4.10624e+07	4.0059e+07	4.06044e+07	3.50164e+07	3.84847e+07	0.0628301	3.90454e+07
	M371T747	371.22	12.45	6.1	Strophanthidol	[M+H-2H2O]+	0.9928	NA	Lipids_and_lipid_like_molecules	Steroids_and_steroid_derivatives	Steroid_lactones	7.02234e+07	7.67728e+07	7.608e+07	5.90752e+07	7.7295e+07	0.107211	7.18893e+07
	M373T820	373.238	13.67	0.6	Digoxigenin	[M+H-H2O]+	0.8954	Cid_15478	Lipids_and_lipid_like_molecules	Steroids_and_steroid_derivatives	Steroid_lactones	1.75477e+08	1.73658e+08	1.87278e+08	2.24934e+08	1.68671e+08	0.122621	1.86003e+08
	M373T856	373.238	14.27	1.3	Glucofrugoside	[M+H-C12H22O10]+	0.8491	Cid_24041587	Lipids_and_lipid_like_molecules	Steroids_and_steroid_derivatives	Steroid_lactones	1.04746e+08	1.29311e+08	1.08198e+08	1.19312e+08	1.14906e+08	0.0839121	1.15295e+08
	M383T566	383.147	9.43	2.8	PLX 647	[M+H]+	0.9612	Cid_11545419	Benzenoids	Benzene_and_substituted_derivatives	Benzylamines	2.65623e+07	2.54055e+07	2.61675e+07	2.67266e+07	2.38517e+07	0.0455914	2.57427e+07
	M383T851	383.22	14.19	8.8	Benzo[g]quinolin-4-yl-[4-(4-ethylpiperazino)phenyl]amine	[M+H]+	0.7711	Cid_159481	Organoheterocyclic_compounds	Quinolines_and_derivatives	Benzoquinolines	1.07837e+08	1.17772e+08	1.16298e+08	1.0341e+08	7.56827e+07	0.163264	1.042e+08
	M395T925	395.22	15.42	1.6	Deoxycorticosterone acetate	[M+Na]+	0.9418	Cid_3001	Lipids_and_lipid_like_molecules	Steroids_and_steroid_derivatives	Pregnane_steroids	1.26177e+07	1.82622e+07	1.49998e+07	2.03141e+07	1.40526e+07	0.196911	1.60493e+07
	M397T672	397.162	11.2	1.6	1,7-Bis(3,4-dihydroxyphenyl)heptan-3-yl acetate	[M+Na]+	0.9833	Cid_24013835	Phenylpropanoids_and_polyketides	Diarylheptanoids	Linear_diarylheptanoids	3.23383e+07	3.07154e+07	3.17134e+07	3.28835e+07	2.89576e+07	0.0494162	3.13217e+07
	M398T723	398.242	12.05	22.9	2-[4-(Diamylamino)-2-hydroxybenzoyl]benzoic acid	[M+H]+	0.9979	Cid_1910889	Benzenoids	Benzene_and_substituted_derivatives	Benzophenones	2.79702e+07	2.16499e+07	2.46245e+07	2.63855e+07	2.93392e+07	0.115406	2.59939e+07
	M401T450	401.16	7.51	0.4	Syringaresinol	[M+H-H2O]+	0.8359	Cid_332426	Lignans__neolignans_and_related_compounds	Furanoid_lignans	unknown	8.51878e+07	8.5387e+07	7.80452e+07	7.57231e+07	7.59074e+07	0.0608099	8.00501e+07
	M401T675	401.23	11.26	0.1	5-[5-(Acetoxymethyl)-7-keto-1,2,4a-trimethyl-3,4,8,8a-tetrahydro-2H-naphthalen-1-yl]-3-methylvaleric acid	[M+Na]+	0.9845	Cid_44715828	Lipids_and_lipid_like_molecules	Prenol_lipids	Diterpenoids	9.55153e+07	7.3989e+07	1.05205e+08	1.04645e+08	9.46382e+07	0.133307	9.47983e+07
	M407T613	407.241	10.21	4.5	Acetyl-L-carnitine	[2M+H]+	0.9984	Cid_7045767	Lipids_and_lipid_like_molecules	Fatty_Acyls	Fatty_acid_esters	1.06328e+08	9.9262e+07	9.34133e+07	1.05837e+08	9.34123e+07	0.0636334	9.96506e+07
	M429T216	429.137	3.6	0.8	Shanziside methyl ester	[M+Na]+	0.9977	Cid_13892722	Lipids_and_lipid_like_molecules	Prenol_lipids	Terpene_glycosides	1.52385e+07	1.49282e+07	1.72859e+07	1.66314e+07	1.39174e+07	0.08671	1.56003e+07
	M431T390	431.134	6.49	0.1	Ononin	[M+H]+	0.9996	Cid_442813	Phenylpropanoids_and_polyketides	Isoflavonoids	Isoflavonoid_O_glycosides	5.13533e+07	5.0133e+07	4.78175e+07	4.92487e+07	4.34156e+07	0.0633783	4.83936e+07
	M445T733	445.212	12.21	0.8	Asperglaucide	[M+H]+	0.9381	Cid_9832120	Organic_acids_and_derivatives	Carboxylic_acids_and_derivatives	Amino_acids__peptides__and_analogues	4.02285e+07	3.96204e+07	4.51752e+07	4.18394e+07	3.86956e+07	0.0618741	4.11118e+07
	M469T300	469.111	5	1.1	3'-Methoxydaidzin	[M+Na]+	0.9964	Cid_13629778	Phenylpropanoids_and_polyketides	Isoflavonoids	Isoflavonoid_O_glycosides	1.23185e+07	1.17551e+07	1.04845e+07	1.0201e+07	1.10418e+07	0.0787067	1.11602e+07
	M483T298	483.188	4.96	6.8	4-Piperazinobenzenesulfonamide	[2M+H]+	0.7254	Cid_901897	Organoheterocyclic_compounds	Diazinanes	Piperazines	1.25465e+07	1.20668e+07	1.15308e+07	1.13422e+07	1.20825e+07	0.0403757	1.19138e+07
	M485T420	485.142	7	0.7	Glycan MC=h2a2	[M+2Na]2+	0.9958	Cid_45266862	Organic_oxygen_compounds	Organooxygen_compounds	Carbohydrates_and_carbohydrate_conjugates	1.74253e+07	1.55072e+07	1.49126e+07	1.50882e+07	1.52877e+07	0.0652082	1.56442e+07
	M503T269	503.153	4.49	1.3	Albiflorin	[M+Na]+	0.9975	Cid_24868421	Lipids_and_lipid_like_molecules	Prenol_lipids	Terpene_glycosides	1.21293e+07	1.21994e+07	1.34847e+07	1.39215e+07	1.3657e+07	0.0649262	1.30784e+07
	M517T439	517.135	7.31	1.7	3-(4-Methoxyphenyl)-4-oxo-4H-chromen-7-yl 6-O-(carboxyacetyl)-.beta.-D-glucopyranoside	[M+H]+	0.9923	Cid_23724663	Phenylpropanoids_and_polyketides	Isoflavonoids	Isoflavonoid_O_glycosides	2.6067e+07	2.33536e+07	2.38137e+07	2.48206e+07	2.18555e+07	0.0659153	2.39821e+07
	M527T46	527.159	0.77	0.9	Erlose	[M+Na]+	0.9986	Cid_193471	Organic_oxygen_compounds	Organooxygen_compounds	Carbohydrates_and_carbohydrate_conjugates	4.39283e+07	4.493e+07	4.86933e+07	4.48021e+07	6.19593e+07	0.154462	4.88626e+07
	M529T771	529.314	12.86	20.2	((4R)-4-((3R,5R,9S,10S,12S,13R,14S,17R)-3,12-dihydroxy-10,13-dimethylhexadecahydro-1H-cyclopenta[a]phenanthren-17-yl)pentanoyl)glycylglycine	[M+Na]+	0.7917	Cid_145740534	Lipids_and_lipid_like_molecules	Steroids_and_steroid_derivatives	Bile_acids__alcohols_and_derivatives	5.79937e+07	5.57022e+07	5.80465e+07	6.528e+07	5.2028e+07	0.08375	5.78101e+07
	M531T757	531.33	12.61	21.9	Kukoamine B	[M+H]+	0.884	Cid_10346914	Benzenoids	Phenols	Benzenediols	4.16234e+08	3.81444e+08	3.87965e+08	3.74189e+08	4.30145e+08	0.0603486	3.97995e+08
	M533T343	533.129	5.72	0.7	6''-O-Malonylglycitin	[M+H]+	0.9841	Cid_23724657	Phenylpropanoids_and_polyketides	Isoflavonoids	Isoflavonoid_O_glycosides	4.0173e+07	3.59417e+07	3.71347e+07	3.97355e+07	4.31709e+07	0.0719597	3.92311e+07
	M533T687_1	533.348	11.45	20.4	Tributyl phosphate	[2M+H]+	0.8786	Cid_31357	Organic_acids_and_derivatives	Organic_phosphoric_acids_and_derivatives	Phosphate_esters	9.30689e+08	8.06475e+08	7.74657e+08	8.38426e+08	7.93697e+08	0.0742225	8.28789e+08
	M555T825	555.33	13.75	18.8	CDDO-TFEA	[M+H-H2O]+	0.9508	Cid_17756663	Benzenoids	Naphthalenes	Naphthalenecarboxylic_acids_and_derivatives	2.47625e+08	1.95826e+08	2.54514e+08	2.26795e+08	2.18986e+08	0.102598	2.28749e+08
	M575T664	575.356	11.07	3.7	Pennogenin-3-O-tetraglycoside	[M+H-C18H32O13]+	0.8481	Cid_24121280	Lipids_and_lipid_like_molecules	Steroids_and_steroid_derivatives	Steroidal_glycosides	1.88494e+08	1.78016e+08	1.77214e+08	2.04886e+08	1.82456e+08	0.0610034	1.86213e+08
	M591T759	591.199	12.64	10.1	Gallomyrtucommulone C	[M+Na]+	0.9697	Cid_51136364	Benzenoids	Benzene_and_substituted_derivatives	Benzoic_acids_and_derivatives	3.53214e+07	3.58147e+07	3.07709e+07	3.68989e+07	3.08133e+07	0.0859369	3.39238e+07
	M285T492_1	285.041	8.21	0.4	Kaempferol	[M-H]-	0.9967	Cid_5280863	Phenylpropanoids_and_polyketides	Flavonoids	Flavones	2.04248e+08	1.87125e+08	1.57545e+08	1.523e+08	1.40889e+08	0.156236	1.68422e+08
	M93T390	93.0337	6.5	11.2	Phenol	[M-H]-	0.9861	Cid_996	Benzenoids	Phenols	1_hydroxy_4_unsubstituted_benzenoids	1.22964e+07	1.28949e+07	1.32845e+07	1.12982e+07	1.23559e+07	0.0603626	1.2426e+07
	M103T56	103.003	0.93	10.4	Malonic acid	[M-H]-	0.8884	Cid_867	Organic_acids_and_derivatives	Carboxylic_acids_and_derivatives	Dicarboxylic_acids_and_derivatives	3.53259e+07	2.62166e+07	2.43171e+07	2.23688e+07	2.32884e+07	0.199305	2.63034e+07
	M109T175	109.028	2.92	9	Pyrocatechol	[M-H]-	0.9957	Cid_289	Benzenoids	Phenols	Benzenediols	8.68022e+06	6.58864e+06	7.54233e+06	6.60212e+06	7.88453e+06	0.119362	7.45957e+06
	M111T68	111.008	1.13	9.7	cis-Aconitic acid	[M-H-CH2O3]-	0.9838	Cid_643757	Organic_acids_and_derivatives	Carboxylic_acids_and_derivatives	Tricarboxylic_acids_and_derivatives	8.88392e+06	1.26686e+07	9.96718e+06	1.06786e+07	1.12904e+07	0.132689	1.06977e+07
	M115T78_2	115.003	1.3	8.8	Maleic acid	[M-H]-	0.9633	Cid_444266	Organic_acids_and_derivatives	Carboxylic_acids_and_derivatives	Dicarboxylic_acids_and_derivatives	3.89002e+07	3.31799e+07	2.63333e+07	2.4855e+07	2.70429e+07	0.19536	3.00623e+07
	M117T79_2	117.018	1.31	8.2	Succinic acid	[M-H]-	0.999	Cid_1110	Organic_acids_and_derivatives	Carboxylic_acids_and_derivatives	Dicarboxylic_acids_and_derivatives	1.64208e+08	1.56501e+08	1.28498e+08	1.15634e+08	1.23796e+08	0.154922	1.37727e+08
	M117T125_2	117.055	2.08	8.4	.beta.-Hydroxyisovaleric acid	[M-H]-	0.7532	Cid_69362	Lipids_and_lipid_like_molecules	Fatty_Acyls	Fatty_acids_and_conjugates	4.7599e+07	3.54656e+07	3.32189e+07	3.17148e+07	4.34822e+07	0.180223	3.82961e+07
	M121T277_2	121.028	4.61	8.3	1-Phenol-2-sulfonic acid, 4-formyl-	[M-H-SO3]-	0.99	Cid_112931	Benzenoids	Benzene_and_substituted_derivatives	Benzenesulfonic_acids_and_derivatives	7.05095e+07	6.02969e+07	6.44831e+07	5.223e+07	7.67708e+07	0.145101	6.4858e+07
	M124T549	124.04	9.15	7.6	6-(Hydroxymethyl)pyridin-3-ol	[M-H]-	0.7597	Cid_419490	Organoheterocyclic_compounds	Pyridines_and_derivatives	Hydroxypyridines	2.68853e+07	3.30504e+07	3.09295e+07	3.70634e+07	2.24435e+07	0.187238	3.00744e+07
	M125T51_2	125	0.85	7.9	Diethyl phosphate	[M-H-C2H4]-	0.9952	Cid_654	Organic_acids_and_derivatives	Organic_phosphoric_acids_and_derivatives	Phosphate_esters	4.79427e+07	3.74584e+07	3.67563e+07	2.91611e+07	3.3646e+07	0.18763	3.69929e+07
	M125T1194	125.023	19.91	7.7	Pyrogallol	[M-H]-	0.9957	Cid_1057	Benzenoids	Phenols	Benzenetriols_and_derivatives	1.45616e+07	1.64599e+07	1.15468e+07	1.57407e+07	1.14958e+07	0.16675	1.3961e+07
	M128T587	128.035	9.79	7.7	Pidolic acid	[M-H]-	0.9859	Cid_7405	Organic_acids_and_derivatives	Carboxylic_acids_and_derivatives	Amino_acids__peptides__and_analogues	4.72963e+07	5.07934e+07	4.43156e+07	3.33244e+07	3.5284e+07	0.180029	4.22028e+07
	M129T875	129.018	14.58	7	L-2-Hydroxyglutaric acid	[M-H-H2O]-	0.9168	Cid_439939	Organic_acids_and_derivatives	Hydroxy_acids_and_derivatives	Short_chain_hydroxy_acids_and_derivatives	2.00171e+07	1.64919e+07	1.29548e+07	1.54472e+07	1.31613e+07	0.18471	1.56145e+07
	M131T788	131.034	13.14	7.7	L-Glutarylcarnitine	[M-H-C7H13NO2]-	0.7075	Cid_71317118	Lipids_and_lipid_like_molecules	Fatty_Acyls	Fatty_acid_esters	2.55441e+07	2.68082e+07	2.40896e+07	2.21785e+07	1.83344e+07	0.141533	2.3391e+07
	M135T47	135.028	0.79	7.3	Threonic acid	[M-H]-	0.9689	Cid_151152	Organic_oxygen_compounds	Organooxygen_compounds	Carbohydrates_and_carbohydrate_conjugates	1.79636e+07	1.98215e+07	1.66463e+07	1.39192e+07	1.1883e+07	0.197424	1.60467e+07
	M137T221_1	137.024	3.69	5.1	3,4-Dihydroxybenzaldehyde	[M-H]-	0.9978	Cid_8768	Organic_oxygen_compounds	Organooxygen_compounds	Carbonyl_compounds	1.6314e+08	1.38556e+08	1.19212e+08	9.85754e+07	1.54025e+08	0.194371	1.34702e+08
	M137T390_2	137.024	6.5	6.6	1-(Hexopyranosyloxy)-7-(hydroxymethyl)-1,4a,5,7a-tetrahydrocyclopenta[c]pyran-5-yl 4-hydroxybenzoate	[M-H-C15H20O8]-	0.9973	Cid_23900070	Lipids_and_lipid_like_molecules	Prenol_lipids	Terpene_glycosides	1.07224e+08	1.15889e+08	1.08733e+08	1.10384e+08	1.11441e+08	0.0297861	1.10734e+08
	M141T677	141.018	11.28	6	Kojic acid	[M-H]-	0.8685	Cid_3840	Organoheterocyclic_compounds	Pyrans	Pyranones_and_derivatives	1.59493e+07	1.75809e+07	1.45227e+07	1.38228e+07	1.36109e+07	0.110132	1.50973e+07
	M143T597	143.034	9.94	6.6	D-Turanose	[M-H-C6H14O7]-	0.8492	Cid_5460935	Lipids_and_lipid_like_molecules	Fatty_Acyls	Fatty_acyl_glycosides	3.78125e+07	3.69583e+07	3.46114e+07	3.29565e+07	3.91987e+07	0.0690672	3.63075e+07
	M147T348	147.045	5.8	6	Asperuloside	[M-H-C9H14O9]-	0.9887	Cid_84298	Organic_oxygen_compounds	Organooxygen_compounds	Carbohydrates_and_carbohydrate_conjugates	1.1551e+07	9.55421e+06	1.04525e+07	9.29114e+06	1.09373e+07	0.0909831	1.03572e+07
	M153T175_2	153.019	2.91	4.9	3-Dehydroshikimic acid	[M-H-H2O]-	0.9968	Cid_439774	Organic_oxygen_compounds	Organooxygen_compounds	Carbonyl_compounds	5.64363e+07	5.42037e+07	4.16958e+07	4.68199e+07	5.34227e+07	0.120639	5.05157e+07
	M153T669	153.055	11.15	5.2	Acetylsyringic acid	[M-H-C3H2O3]-	0.9772	Cid_225680	Benzenoids	Benzene_and_substituted_derivatives	Benzoic_acids_and_derivatives	2.08114e+07	1.82954e+07	1.76245e+07	1.61637e+07	1.40363e+07	0.144741	1.73862e+07
	M159T244	159.066	4.06	5.1	Pimelic acid	[M-H]-	0.885	Cid_385	Lipids_and_lipid_like_molecules	Fatty_Acyls	Fatty_acids_and_conjugates	2.55351e+07	2.06641e+07	1.82192e+07	1.91612e+07	2.03255e+07	0.136127	2.0781e+07
	M163T645	163.039	10.74	7.2	5-(1,1-Dimethylallyl)-2-hydroxy-4-methoxybenzaldehyde	[M-H-C4H8]-	0.9582	Cid_125416427	Benzenoids	Phenols	Methoxyphenols	3.98119e+07	3.8629e+07	3.3484e+07	3.40717e+07	3.06837e+07	0.107343	3.53361e+07
	M165T45_2	165.04	0.75	5	D-Arabinonic acid	[M-H]-	0.8821	Cid_122045	Organic_oxygen_compounds	Organooxygen_compounds	Carbohydrates_and_carbohydrate_conjugates	2.57025e+07	2.8802e+07	2.234e+07	1.96672e+07	2.17014e+07	0.152695	2.36426e+07
	M165T633	165.055	10.56	4.6	Isopaeonol	[M-H]-	0.99	Cid_529402	Organic_oxygen_compounds	Organooxygen_compounds	Carbonyl_compounds	3.96532e+07	3.9985e+07	3.48041e+07	3.62781e+07	3.18904e+07	0.0931134	3.65221e+07
	M167T152	167.035	2.54	4.6	Lecanoric acid	[M-H-C8H6O3]-	0.9713	Cid_99613	Phenylpropanoids_and_polyketides	Depsides_and_depsidones	unknown	3.77804e+07	3.4497e+07	3.00242e+07	3.30678e+07	3.54964e+07	0.0844369	3.41731e+07
	M173T302_1	173.081	5.03	3.2	Suberic acid	[M-H]-	0.9968	Cid_10457	Lipids_and_lipid_like_molecules	Fatty_Acyls	Fatty_acids_and_conjugates	8.65776e+07	6.99322e+07	6.66297e+07	6.07938e+07	7.75026e+07	0.138521	7.22872e+07
	M177T319	177.04	5.31	3.7	1,5-Gluconolactone	[M-H]-	0.8113	Cid_7027	Organic_oxygen_compounds	Organooxygen_compounds	Carbohydrates_and_carbohydrate_conjugates	2.61275e+07	2.5916e+07	2.57234e+07	2.08958e+07	2.04435e+07	0.12111	2.38213e+07
	M177T304	177.041	5.07	3.8	L-Gulono-1,4-lactone	[M-H]-	0.8163	Cid_439373	Organoheterocyclic_compounds	Lactones	Gamma_butyrolactones	5.06632e+07	3.38797e+07	5.08831e+07	3.99082e+07	4.6633e+07	0.16595	4.43935e+07
	M181T44_2	181.071	0.74	3.9	D-Glucitol	[M-H]-	0.9945	Cid_5780	Organic_oxygen_compounds	Organooxygen_compounds	Carbohydrates_and_carbohydrate_conjugates	6.86745e+07	5.86708e+07	6.14827e+07	4.55749e+07	5.5912e+07	0.145439	5.8063e+07
	M187T363_2	187.097	6.05	3.4	Azelaic acid	[M-H]-	0.986	Cid_2266	Lipids_and_lipid_like_molecules	Fatty_Acyls	Fatty_acids_and_conjugates	3.30256e+08	2.93304e+08	2.61482e+08	2.51864e+08	2.52847e+08	0.121388	2.77951e+08
	M195T45_1	195.05	0.74	2.7	Galactonic acid	[M-H]-	0.9913	Cid_128869	Organic_acids_and_derivatives	Hydroxy_acids_and_derivatives	Medium_chain_hydroxy_acids_and_derivatives	8.37014e+07	8.62542e+07	9.18814e+07	8.12218e+07	7.23171e+07	0.0866392	8.30752e+07
	M197T442	197.081	7.36	2.5	(+)-Camphanic acid	[M-H]-	0.9677	Cid_114518	Organoheterocyclic_compounds	Lactones	Delta_valerolactones	1.20694e+07	1.06862e+07	1.04249e+07	8.27777e+06	1.0268e+07	0.13126	1.03452e+07
	M201T434_1	201.113	7.24	2.5	Sebacic acid	[M-H]-	0.9853	Cid_5192	Lipids_and_lipid_like_molecules	Fatty_Acyls	Fatty_acids_and_conjugates	3.06679e+07	2.49823e+07	2.3232e+07	2.15886e+07	2.01657e+07	0.168934	2.41273e+07
	M205T464	205.05	7.73	1.8	Mono-O-methylcurvulinic acid	[M-H-H2O]-	0.9785	Cid_16745395	Organic_oxygen_compounds	Organooxygen_compounds	Carbonyl_compounds	1.69608e+07	1.61064e+07	1.58136e+07	1.58654e+07	1.47178e+07	0.0504738	1.58928e+07
	M211T354_1	211.061	5.9	1.8	Eudesmic acid	[M-H]-	0.8396	Cid_8357	Benzenoids	Benzene_and_substituted_derivatives	Benzoic_acids_and_derivatives	2.25209e+07	1.97786e+07	1.86983e+07	2.08606e+07	1.90885e+07	0.0762945	2.01894e+07
	M217T45_3	217.047	0.75	1.6	Dulcitol	[M+Cl]-	0.7471	Cid_11850	Organic_oxygen_compounds	Organooxygen_compounds	Carbohydrates_and_carbohydrate_conjugates	1.49345e+07	1.78822e+07	1.65473e+07	1.34215e+07	1.54874e+07	0.107329	1.56546e+07
	M217T319_1	217.108	5.32	0.4	3-Hydroxysebacic acid	[M-H]-	0.9651	Cid_3017884	Organic_acids_and_derivatives	Hydroxy_acids_and_derivatives	Medium_chain_hydroxy_acids_and_derivatives	2.31376e+07	1.76281e+07	1.86178e+07	1.66087e+07	1.92651e+07	0.131024	1.90515e+07
	M221T627	221.154	10.45	1.2	3,6-Ditert-butyl-1,2-benzenediol	[M-H]-	0.993	Cid_3712192	Benzenoids	Benzene_and_substituted_derivatives	Phenylpropanes	1.42057e+07	1.27315e+07	1.15515e+07	1.14637e+07	1.19425e+07	0.0918773	1.2379e+07
	M233T827	233.154	13.79	1.1	(E)-5-(3-Hydroxy-2,3-dimethylnorbornan-2-yl)-2-methylpent-2-enoic acid	[M-H-H2O]-	0.999	Cid_23786265	Lipids_and_lipid_like_molecules	Prenol_lipids	Sesquiterpenoids	2.91717e+07	3.54089e+07	2.86733e+07	2.48805e+07	2.48033e+07	0.15141	2.85875e+07
	M241T267_2	241.119	4.45	0.7	L-.gamma.-Glutamyl-L-leucine	[M-H-H2O]-	0.9804	Cid_4524287	Organic_acids_and_derivatives	Carboxylic_acids_and_derivatives	Amino_acids__peptides__and_analogues	3.07279e+07	2.19188e+07	2.16499e+07	1.88765e+07	2.26273e+07	0.192766	2.31601e+07
	M247T728	247.134	12.13	0.4	Atractylenolide iii	[M-H]-	0.9687	NA	Lipids_and_lipid_like_molecules	Prenol_lipids	Terpene_lactones	2.21782e+07	2.03856e+07	1.83045e+07	1.6933e+07	1.66301e+07	0.125099	1.88863e+07
	M249T690_2	249.149	11.5	0.2	NCGC00385483-01	[M-H]-	0.998	Cid_128963627	Lipids_and_lipid_like_molecules	Prenol_lipids	Sesquiterpenoids	1.80913e+08	1.67981e+08	1.57829e+08	1.57333e+08	1.42607e+08	0.0880135	1.61333e+08
	M253T417	253.054	6.96	23.3	3',5'-Dihydroxyflavone	[M-H]-	0.7358	Cid_45933941	Phenylpropanoids_and_polyketides	Flavonoids	Hydroxyflavonoids	1.13018e+07	1.30315e+07	1.14929e+07	9.56742e+06	1.34924e+07	0.132259	1.17772e+07
	M261T337_1	261.134	5.61	1.4	9-Glyceryloxy-9-ketopelargonic acid	[M-H]-	0.9354	Cid_45783154	Lipids_and_lipid_like_molecules	Fatty_Acyls	Fatty_acids_and_conjugates	3.50827e+07	2.87863e+07	2.53933e+07	2.34092e+07	2.46022e+07	0.171531	2.74547e+07
	M263T463	263.129	7.72	0	Spirodionic acid	[M-H]-	0.9972	Cid_60208865	Lipids_and_lipid_like_molecules	Prenol_lipids	Monoterpenoids	3.72968e+07	3.15531e+07	2.92136e+07	2.89228e+07	3.26447e+07	0.106077	3.19262e+07
	M265T627	265.145	10.44	0.2	Dendocarbin M	[M-H]-	0.971	Cid_45783127	Organoheterocyclic_compounds	Naphthofurans	unknown	2.22462e+07	1.79782e+07	1.52437e+07	1.58379e+07	2.29458e+07	0.189698	1.88503e+07
	M267T498_2	267.066	8.3	0.2	Rubiadin 1-methyl ether	[M-H]-	0.9495	Cid_96191	Benzenoids	Anthracenes	Anthraquinones	1.19835e+08	1.03746e+08	9.30724e+07	8.96045e+07	8.73194e+07	0.135539	9.87156e+07
	M267T717_2	267.066	11.95	0.3	4-[(E)-3-[4-(Carboxymethoxy)phenyl]-3-ketoprop-1-enyl]benzoic acid	[M-H-C2H2O2]-	0.9968	Cid_6443801	Phenylpropanoids_and_polyketides	Linear_1_3_diarylpropanoids	Chalcones_and_dihydrochalcones	1.12911e+08	9.25796e+07	9.90436e+07	9.08712e+07	8.45273e+07	0.112313	9.59866e+07
	M267T590	267.068	9.83	0.1	Formononetin	[M-H]-	0.993	Cid_5280378	Phenylpropanoids_and_polyketides	Isoflavonoids	O_methylated_isoflavonoids	3.83732e+07	3.46186e+07	4.3184e+07	3.26337e+07	3.26371e+07	0.124289	3.62893e+07
	M267T344	267.069	5.74	0.1	Tectochrysin	[M-H]-	0.9443	Cid_5281954	Phenylpropanoids_and_polyketides	Flavonoids	O_methylated_flavonoids	1.8036e+07	1.57909e+07	1.63646e+07	1.59292e+07	1.04834e+07	0.185917	1.53208e+07
	M269T644	269.046	10.73	0.5	Frangulin A	[M-H-C6H10O4]-	0.9928	Cid_196979	Benzenoids	Anthracenes	Anthraquinones	6.98684e+07	6.71961e+07	7.3093e+07	6.92697e+07	6.80503e+07	0.0325814	6.94955e+07
	M269T530_1	269.082	8.84	1.3	Alpinetin	[M-H]-	0.994	Cid_154279	Phenylpropanoids_and_polyketides	Flavonoids	O_methylated_flavonoids	2.63585e+08	2.55288e+08	2.11085e+08	2.22155e+08	2.01442e+08	0.1187	2.30711e+08
	M271T503	271.061	8.39	0.3	Naringenin	[M-H]-	0.9922	Cid_439246	Phenylpropanoids_and_polyketides	Flavonoids	Flavans	3.47089e+07	2.49818e+07	2.49263e+07	2.12803e+07	2.34468e+07	0.199692	2.58688e+07
	M271T920	271.228	15.33	0.3	2-Hydroxypalmitic acid	[M-H]-	0.9855	Cid_92836	Lipids_and_lipid_like_molecules	Fatty_Acyls	Fatty_acids_and_conjugates	9.97607e+06	1.06554e+07	8.25152e+06	9.64385e+06	1.33586e+07	0.181462	1.03771e+07
	M273T265	273.077	4.42	0.9	(+)-Afzelechin	[M-H]-	0.9541	Cid_442154	Phenylpropanoids_and_polyketides	Flavonoids	Flavans	8.63582e+06	6.97669e+06	6.46916e+06	5.52317e+06	8.3369e+06	0.180704	7.18835e+06
	M273T502_1	273.114	8.36	0.6	10-Hydroxy-7,9-dimethyl-1,3,4,4a,7,7a-hexahydrobenzo[e]naphthalene-2,8,11-trione	[M-H]-	0.8744	Cid_75411903	Organic_oxygen_compounds	Organooxygen_compounds	Carbonyl_compounds	3.52903e+07	3.20314e+07	2.94408e+07	2.69703e+07	2.70032e+07	0.117835	3.01472e+07
	M275T636	275.129	10.6	15.2	L-Saccharopine	[M-H]-	0.9936	Cid_1087	Organic_acids_and_derivatives	Carboxylic_acids_and_derivatives	Amino_acids__peptides__and_analogues	1.75295e+07	1.50607e+07	1.76734e+07	1.59289e+07	1.44442e+07	0.0896773	1.61273e+07
	M279T363	279.123	6.05	0.2	(E)-2-(Hydroxymethyl)-3-(3-oxo-5-propan-2-yl-4,5,6,7-tetrahydro-1H-2-benzofuran-4-yl)prop-2-enoic acid	[M-H]-	0.9689	Cid_45782757	Lipids_and_lipid_like_molecules	Prenol_lipids	Terpene_lactones	3.53896e+07	3.03794e+07	2.59889e+07	2.39781e+07	2.38696e+07	0.17684	2.79211e+07
	M281T592_2	281.081	9.87	0.2	6-Hydroxy-3-(4-methoxyphenyl)-4-methylcoumarin	[M-H]-	0.9806	Cid_688948	Phenylpropanoids_and_polyketides	Isoflavonoids	Hydroxyisoflavonoids	2.51722e+08	2.07686e+08	1.80723e+08	1.7265e+08	1.82638e+08	0.161815	1.99083e+08
	M281T384	281.082	6.41	0.4	6-Methyltectochrysin	[M-H]-	0.9837	Cid_369599	Phenylpropanoids_and_polyketides	Flavonoids	O_methylated_flavonoids	7.15152e+07	5.68418e+07	5.92377e+07	5.35248e+07	5.56841e+07	0.119616	5.93607e+07
	M281T719_2	281.082	11.98	0.1	Klainetin B	[M-H-C6H6O2]-	0.9636	Cid_9930398	Phenylpropanoids_and_polyketides	Diarylheptanoids	Linear_diarylheptanoids	9.70285e+07	8.2699e+07	8.40086e+07	7.8648e+07	6.72506e+07	0.130772	8.19269e+07
	M283T446_2	283.061	7.44	2.1	Genkwanin	[M-H]-	0.994	Cid_5281617	Phenylpropanoids_and_polyketides	Flavonoids	O_methylated_flavonoids	1.26475e+08	1.17745e+08	1.19605e+08	9.65618e+07	1.1704e+08	0.0971376	1.15485e+08
	M283T343	283.061	5.71	2.2	Calycosin	[M-H]-	0.9964	Cid_5280448	Phenylpropanoids_and_polyketides	Isoflavonoids	O_methylated_isoflavonoids	1.46533e+07	1.38694e+07	1.26921e+07	1.21673e+07	9.65002e+06	0.152199	1.26064e+07
	M283T492	283.098	8.2	0.1	2,3-Dimethoxy-2'-hydroxychalcone	[M-H]-	0.864	Cid_6296545	Phenylpropanoids_and_polyketides	Linear_1_3_diarylpropanoids	Chalcones_and_dihydrochalcones	3.11029e+07	2.39592e+07	3.01089e+07	2.59225e+07	2.16365e+07	0.151437	2.6546e+07
	M285T656	285.041	10.94	11.4	Oxazepam	[M-H]-	0.9954	NA	Organoheterocyclic_compounds	Benzodiazepines	1_4_benzodiazepines	4.39232e+08	3.93679e+08	3.91449e+08	4.58853e+08	3.45337e+08	0.109822	4.0571e+08
	M285T587	285.077	9.79	0.4	Sakuranetin	[M-H]-	0.9222	Cid_348130	Phenylpropanoids_and_polyketides	Flavonoids	O_methylated_flavonoids	3.32229e+07	3.49621e+07	2.11493e+07	3.09752e+07	2.76166e+07	0.184452	2.95852e+07
	M285T312	285.077	5.21	0.6	5,7-Dihydroxy-4-(4-methoxyphenyl)chroman-2-one	[M-H]-	0.9442	Cid_11460348	Phenylpropanoids_and_polyketides	Neoflavonoids	Neoflavans	8.73618e+06	7.57917e+06	5.86355e+06	6.67221e+06	8.62627e+06	0.165643	7.49548e+06
	M287T372	287.093	6.21	0.6	Asebotin	[M-H-C6H10O5]-	0.8257	Cid_11190157	Phenylpropanoids_and_polyketides	Flavonoids	Flavonoid_glycosides	1.96908e+07	1.6503e+07	1.46699e+07	1.55392e+07	1.63323e+07	0.114946	1.6547e+07
	M290T68_2	290.088	1.13	3.5	N-Fructosyl pyroglutamate	[M-H]-	0.9836	Cid_139292107	Organic_acids_and_derivatives	Carboxylic_acids_and_derivatives	Amino_acids__peptides__and_analogues	9.35276e+06	1.1589e+07	1.01307e+07	9.46449e+06	1.25856e+07	0.132966	1.06245e+07
	M293T692	293.176	11.54	0.4	[6]-Gingerol	[M-H]-	0.9645	Cid_442793	Benzenoids	Phenols	Methoxyphenols	1.51374e+07	1.32968e+07	1.19948e+07	1.32752e+07	1.10343e+07	0.119608	1.29477e+07
	M295T795_1	295.228	13.24	0.3	9(10)-EpOME	[M-H]-	0.999	Cid_12097313	Lipids_and_lipid_like_molecules	Fatty_Acyls	Fatty_acids_and_conjugates	6.87148e+07	6.01479e+07	5.80186e+07	5.75867e+07	5.04111e+07	0.111325	5.89758e+07
	M297T609	297.077	10.16	0.1	1'',2''-Dihydroxanthohumol K	[M-H-C4H8]-	0.7236	Cid_23251203	Phenylpropanoids_and_polyketides	Cinnamic_acids_and_derivatives	Hydroxycinnamic_acids_and_derivatives	1.53684e+07	1.47151e+07	1.23549e+07	1.32631e+07	1.30857e+07	0.0903123	1.37574e+07
	M297T684_2	297.077	11.41	0.1	6,3'-Dimethoxy-3-hydroxyflavone	[M-H]-	0.7949	Cid_688835	Phenylpropanoids_and_polyketides	Flavonoids	Flavones	7.61703e+07	7.08403e+07	8.25823e+07	6.00107e+07	6.53408e+07	0.124749	7.09889e+07
	M297T290	297.134	4.84	0.2	2-(Hydroxy(7a-hydroxy-3-oxo-5-(propan-2-yl)octahydro-2-benzofuran-4-yl)methyl)prop-2-enoic acid	[M-H]-	0.9038	Cid_129008965	Lipids_and_lipid_like_molecules	Prenol_lipids	Terpene_lactones	1.97967e+07	1.614e+07	1.32813e+07	1.20309e+07	1.708e+07	0.197232	1.56658e+07
	M297T849	297.244	14.15	0	3-Oxostearic acid	[M-H]-	0.9759	Cid_5283005	Lipids_and_lipid_like_molecules	Fatty_Acyls	Fatty_acids_and_conjugates	1.64756e+07	2.32005e+07	1.84129e+07	1.90562e+07	1.90731e+07	0.127482	1.92437e+07
	M299T813	299.093	13.55	0.4	2,2'-Dihydroxy-4',6'-dimethoxychalcone	[M-H]-	0.9385	Cid_5964319	Phenylpropanoids_and_polyketides	Linear_1_3_diarylpropanoids	Chalcones_and_dihydrochalcones	1.02791e+07	9.31444e+06	9.33941e+06	8.29821e+06	9.84458e+06	0.0786653	9.41515e+06
	M301T518	301.072	8.63	0.1	7-O-Methyleriodictyol	[M-H]-	0.7475	Cid_4872981	Phenylpropanoids_and_polyketides	Flavonoids	O_methylated_flavonoids	4.63292e+07	3.96934e+07	3.95957e+07	3.9413e+07	3.56106e+07	0.0963908	4.01284e+07
	M301T514	301.109	8.57	0.1	Isomucronulatol	[M-H]-	0.7252	Cid_10380176	Phenylpropanoids_and_polyketides	Isoflavonoids	O_methylated_isoflavonoids	1.89732e+08	1.40243e+08	2.02566e+08	1.35273e+08	1.88324e+08	0.181647	1.71227e+08
	M303T465_2	303.124	7.75	0.2	Methyl 4-((4,6-dihydroxy-5-methoxy-2,5-dimethyl-3-oxocyclohex-1-en-1-yl)oxy)-2-hydroxy-3,6-dimethylbenzoate	[M-H-C2H4O3]-	0.8757	Cid_45782752	Benzenoids	Benzene_and_substituted_derivatives	Benzoic_acids_and_derivatives	2.7092e+07	2.35019e+07	2.42531e+07	2.20143e+07	2.0988e+07	0.099416	2.35699e+07
	M311T331	311.056	5.51	0.4	4-(3,4-Dihydroxyphenyl)-6,7-dihydroxy-2-naphthoic acid	[M-H]-	0.8914	Cid_195328	Benzenoids	Naphthalenes	Naphthalenecarboxylic_acids_and_derivatives	8.06219e+06	6.40291e+06	6.71111e+06	5.33283e+06	5.91388e+06	0.158003	6.48458e+06
	M311T363_2	311.15	6.05	0.1	8-(Hydroxymethyl)-3,8-dimethyl-2-oxooctahydro-3a,7-ethanoindene-4-carboxylic acid	[M+FA-H]-	0.9832	Cid_75368792	Lipids_and_lipid_like_molecules	Prenol_lipids	Diterpenoids	3.36434e+07	2.92347e+07	2.55975e+07	2.57008e+07	2.51286e+07	0.130131	2.7861e+07
	M311T706_2	311.223	11.77	0	(9Z,12E)-15,16-Dihydroxyoctadeca-9,12-dienoic acid	[M-H]-	0.9813	Cid_45783236	Lipids_and_lipid_like_molecules	Fatty_Acyls	Lineolic_acids_and_derivatives	4.66475e+07	3.96281e+07	3.79986e+07	3.15255e+07	3.24497e+07	0.162401	3.76499e+07
	M313T773_2	313.239	12.88	0.4	Oxiraneoctanoic acid, .eta.-hydroxy-3-octyl-	[M-H]-	0.9745	Cid_53851542	Lipids_and_lipid_like_molecules	Fatty_Acyls	Lineolic_acids_and_derivatives	1.06637e+08	1.11132e+08	1.09691e+08	1.20055e+08	1.0175e+08	0.0613616	1.09853e+08
	M315T783_1	315.254	13.05	1.2	Methyl palmitate	[M+HCO2]-	0.9982	Cid_8181	Lipids_and_lipid_like_molecules	Fatty_Acyls	Fatty_acid_esters	3.89289e+08	3.69431e+08	3.30579e+08	2.96972e+08	2.69546e+08	0.149534	3.31163e+08
	M325T923	325.217	15.38	0.3	(.+/-.)20-HDoHE	[M-H-H2O]-	0.8376	Cid_16061143	Lipids_and_lipid_like_molecules	Fatty_Acyls	Fatty_acids_and_conjugates	8.39761e+06	8.91465e+06	1.1411e+07	7.66713e+06	9.36141e+06	0.15433	9.15035e+06
	M329T609	329.233	10.16	2.9	FA 18:1+3o	[M-H]-	0.9895	Cid_153001	Lipids_and_lipid_like_molecules	Fatty_Acyls	Fatty_acids_and_conjugates	3.55215e+07	2.93799e+07	2.26993e+07	2.51029e+07	2.49764e+07	0.184314	2.7536e+07
	M359T358	359.078	5.97	1.1	Rosmarinic acid	[M-H]-	0.9985	Cid_5281792	Phenylpropanoids_and_polyketides	Cinnamic_acids_and_derivatives	Hydroxycinnamic_acids_and_derivatives	1.8546e+07	1.52443e+07	1.33372e+07	1.46463e+07	1.23067e+07	0.160462	1.48161e+07
	M447T720	447.145	12	12.5	Barlerin	[M-H]-	0.8216	Cid_18759764	Lipids_and_lipid_like_molecules	Prenol_lipids	Terpene_glycosides	2.73605e+07	2.11622e+07	1.98767e+07	2.22052e+07	1.79206e+07	0.163206	2.1705e+07
	M475T389	475.125	6.48	0.9	Ononin	[M+HCO2]-	0.9983	Cid_442813	Phenylpropanoids_and_polyketides	Isoflavonoids	Isoflavonoid_O_glycosides	1.59399e+07	1.65045e+07	1.32172e+07	1.26936e+07	1.29059e+07	0.127626	1.42522e+07
	M475T52	475.131	0.87	15.1	Grandidentoside	[M+Cl]-	0.9005	Cid_51136585	Phenylpropanoids_and_polyketides	Cinnamic_acids_and_derivatives	Hydroxycinnamic_acids_and_derivatives	1.57571e+07	1.94726e+07	1.53971e+07	1.38557e+07	1.57442e+07	0.128991	1.60454e+07
	M547T755	547.177	12.58	18.3	Sibiricose A6	[M-H]-	0.9102	Cid_6326021	Phenylpropanoids_and_polyketides	Cinnamic_acids_and_derivatives	Hydroxycinnamic_acids_and_derivatives	1.56321e+07	1.32898e+07	1.18778e+07	1.13916e+07	1.02212e+07	0.166323	1.24825e+07
	M567T759	567.203	12.65	9.5	Gallomyrtucommulone C	[M-H]-	0.791	Cid_51136364	Benzenoids	Benzene_and_substituted_derivatives	Benzoic_acids_and_derivatives	6.07178e+07	4.70674e+07	4.94763e+07	5.42796e+07	4.42599e+07	0.12678	5.11602e+07
